# Supplementary material for: Factors associated with long-term prescription of benzodiazepine: a retrospective cohort study using a health insurance database in Japan
Source: PubMed Central journal article supplement — BMJ Open. 2019 Jul 26;9(7):e029641. doi: 10.1136/bmjopen-2019-029641 (PMC6661576; doi:10.1136/bmjopen-2019-029641), 2019-07-26
Supplement: bmjopen-2019-029641.draft_revisions.pdf [file bmjopen-2019-029641.draft_revisions.pdf]

# BMJ Open

BMJ Open is committed to open peer review. As part of this commitment we make the peer review history of every article we publish publicly available.

When an article is published we post the peer reviewers' comments and the authors' responses online. We also post the versions of the paper that were used during peer review. These are the versions that the peer review comments apply to.

The versions of the paper that follow are the versions that were submitted during the peer review process. They are not the versions of record or the final published versions. They should not be cited or distributed as the published version of this manuscript.

BMJ Open is an open access journal and the full, final, typeset and author-corrected version of record of the manuscript is available on our site with no access controls, subscription charges or pay-per-view fees (<http://bmjopen.bmj.com>).

If you have any questions on BMJ Open's open peer review process please email [info.bmjopen@bmj.com](mailto:info.bmjopen@bmj.com)

# BMJ Open

## Factors associated with long-term prescription of benzodiazepine: a retrospective cohort study using a health insurance database in Japan

|                               |                                                                                                                                                                                                                                                                                                                                                                                                                                                                                                                                                                                                                                                                                 |
|-------------------------------|---------------------------------------------------------------------------------------------------------------------------------------------------------------------------------------------------------------------------------------------------------------------------------------------------------------------------------------------------------------------------------------------------------------------------------------------------------------------------------------------------------------------------------------------------------------------------------------------------------------------------------------------------------------------------------|
| Journal:                      | <i>BMJ Open</i>                                                                                                                                                                                                                                                                                                                                                                                                                                                                                                                                                                                                                                                                 |
| Manuscript ID                 | bmjopen-2019-029641                                                                                                                                                                                                                                                                                                                                                                                                                                                                                                                                                                                                                                                             |
| Article Type:                 | Research                                                                                                                                                                                                                                                                                                                                                                                                                                                                                                                                                                                                                                                                        |
| Date Submitted by the Author: | 03-Feb-2019                                                                                                                                                                                                                                                                                                                                                                                                                                                                                                                                                                                                                                                                     |
| Complete List of Authors:     | Takano, Ayumi; Yokohama City University, Department of Psychiatric Nursing<br>Ono, Sachiko; The University of Tokyo, Department of Biostatistics & Bioinformatics<br>Yamana, Hayato; The University of Tokyo, Department of Health Services Research<br>Matsui, Hiroki; The University of Tokyo, Department of Clinical Epidemiology and Health Economics<br>Matsumoto, Toshihiko; National Center of Neurology and Psychiatry, Department of Drug Dependence Research<br>Yasunaga, Hideo; School of Public Health, The University of Tokyo, Department of Clinical Epidemiology and Health Economics<br>Kawakami, Norito; The University of Tokyo, Department of Mental Health |
| Keywords:                     | Benzodiazepine, Cohort study, Dependence, Long-term prescription, Risk factors                                                                                                                                                                                                                                                                                                                                                                                                                                                                                                                                                                                                  |
|                               |                                                                                                                                                                                                                                                                                                                                                                                                                                                                                                                                                                                                                                                                                 |

SCHOLARONE™  
Manuscripts

1  
2  
3  
4  
5  
6 Factors associated with long-term prescription of benzodiazepine: a retrospective cohort  
7 study using a health insurance database in Japan  
8  
9

- 10  
11 1. Ayumi Takano, PhD,  
12 Department of Psychiatric Nursing, Yokohama City University  
13  
14 2. Sachiko Ono, MPH,  
15 Department of Biostatistics & Bioinformatics, The University of Tokyo  
16  
17 3. Hayato Yamana, PhD,  
18 Department of Health Services Research, The University of Tokyo  
19  
20 4. Hiroki Matsui, MPH,  
21 Department of Clinical Epidemiology and Health Economics, The University of  
22 Tokyo  
23  
24 5. Toshihiko Matsumoto, PhD,  
25 Department of Drug Dependence Research, National Center of Neurology and  
26 Psychiatry  
27  
28 6. Hideo Yasunaga, PhD,  
29 Department of Clinical Epidemiology and Health Economics, The University of  
30 Tokyo  
31  
32 7. Norito Kawakami, PhD  
33 Department of Mental Health, The University of Tokyo  
34  
35

36  
37 Corresponding author

38 Ayumi Takano

39 Department of Psychiatric Nursing, Yokohama City University,  
40 3-9 Fukuura, Kanazawa-Ku, Yokohama, Kanagawa 236-0004, Japan  
41  
42

43 TEL: +81 45 787 2751

44 ayumi-takano@umin.ac.jp  
45  
46  
47  
48

49 Word count: 2088

50  
51  
52 Key words:

53 Benzodiazepine, Cohort study, Dependence, Long-term prescription, Risk factors,  
54  
55  
56  
57  
58  
59  
60

1  
2  
3  
4  
5  
6 **Abstract**  
7

8  
9 2 Objectives: Long-term prescriptions of benzodiazepine drugs (BZD) seem to remain,  
10  
11 3 although clinical guidelines aim to prevent it. The aim of this study was to investigate  
12  
13 4 the proportion of the long-term BZD prescription and its risk factors.  
14  
15

16  
17  
18 5 Design: Retrospective cohort study using a health insurance database.  
19

20  
21 6 Setting: Japan.  
22

23  
24 7 Participants: A total 88,001 patients were identified outpatients aged 18 to 65 who  
25  
26 8 started BZDs between October 1st, 2012 and April 1st, 2015. After excluding patients  
27  
28 9 without eight months follow-up (n = 12,325), and patients who underwent surgery on  
29  
30 10 the day of first BZD prescription (n = 3,721), 71,955 outpatients were analyzed.  
31  
32

33  
34 11 Main outcome measures: We investigated the proportion of the long-term prescription  
35  
36 12 for  $\geq 8$  months among the new BZD users. We assessed patient demographics,  
37  
38 13 diagnoses, initial BZD prescription, and prescribers as potential predictors of the long-  
39  
40 14 term BZD prescription. Multivariable logistic regression was performed to assess the  
41  
42 15 association between the long-term prescription and the potential predictors.  
43  
44

45  
46 16 Results: Of the new BZD users, 6,462 (9.0%) were consecutively prescribed BZD for  
47  
48 17  $\geq 8$  months. The long-term prescription was significantly associated with cancer, aging,  
49  
50 18 mood and neurotic disorder, hypnotics, prescription by psychiatrists, and high-dose  
51  
52  
53  
54  
55  
56  
57  
58  
59  
60

1  
2  
3  
4  
5  
6  
7 19 BZD at the initial prescription.  
8

9 20 Conclusion: Despite the recent clinical guidelines, 9% of new BZD users were  
10  
11  
12 21 prescribed for more than 8 months. Physicians should be aware of the risk factors when  
13  
14  
15 22 prescribing BZDs for the first time.  
16  
17

18 23  
19  
20  
21 24 **Strengths and limitations of this study**  
22

- 23  
24 25 ● A large sample of the Japanese outpatients among the non-elderly adult population.  
25  
26  
27 26 ● Analyzed new benzodiazepine users to prevent prevalent user bias.  
28  
29  
30 27 ● A strict definition of long-term use of benzodiazepine by identifying consecutive  
31  
32  
33 28 monthly prescription data.  
34  
35  
36 29 ● Limitation of detailed and accurate information in the health insurance database  
37  
38  
39 30 such as the diagnosis and the severity of psychiatric disorders.  
40  
41

42 31  
43  
44  
45 32 **Introduction**  
46

47  
48 33 Concerns about long-term use of benzodiazepines and benzodiazepine-related drugs  
49  
50  
51 34 (BZDs) have been raised over the world. Although BZDs are safer than old sedative-  
52  
53  
54 35 hypnotics, efficacy of their long-term use has not been demonstrated. Long-term use of  
55  
56  
57 36 BZD leads to dependence.<sup>1</sup> Patients may become dependent on BZDs to avoid  
58  
59  
60

1  
2  
3  
4  
5  
6 37 withdrawal symptoms.<sup>1-3</sup> Studies showed several adverse consequences related to long-  
7  
8  
9 38 term use of BZD, including dementia among elderly people<sup>4,5</sup> and fracture<sup>6,7</sup> cancer<sup>8</sup>  
10  
11  
12 39 and car accident<sup>9</sup> in any generation.  
13  
14

15 40 Understanding prevalence of long-term use of BZDs and its risk factors is  
16  
17  
18 41 essential to prevent adverse consequences. However, reported prevalence of long-term  
19  
20  
21 42 BZD use varied widely because of variability in definition of long-term BZD prescription,  
22  
23  
24 43 study participants, and follow-up period<sup>10,11</sup> Over a half of the studies did not provide  
25  
26  
27 44 plausible explanation for the definitions.<sup>11</sup> Some studies used one prescription per year  
28  
29  
30 45 or per several months as definition of long-term BZD prescription and others included  
31  
32  
33 46 prevalent users of BZDs or only the elderly as study population. These studies may have  
34  
35  
36 47 overestimated the proportion of long-term prescription of BZDs.  
37  
38

39 48 Reported risk factors of long-term prescription have been also inconsistent. In a  
40  
41  
42 49 systematic review,<sup>11</sup> long-term prescription of BZDs were associated with older age,  
43  
44  
45 50 psychiatric disorders, and polypharmacy or high-dose BZDs at the initial prescription.  
46  
47  
48 51 However, association of several other factors with long term use of BZDs remains  
49  
50  
51 52 inconsistent, including demographic variables (e.g. gender, income), type of BZDs (e.g.  
52  
53  
54 53 half-life, Z-drug), or characteristics of prescriber (e.g. psychiatry). The inconsistency  
55  
56  
57 54 may have been affected by variability of definition of long-term use of BZD.<sup>11</sup> For  
58  
59  
60

1  
2  
3  
4  
5  
6 55 example, in a study where long-term prescription was defined as at least one  
7  
8  
9 56 prescription every three months, female was a risk factor. <sup>12</sup> However, in another study  
10  
11  
12 57 where long-term prescription was defined as lasting BZD use for 60 days, male was a  
13  
14  
15 58 risk factor. <sup>13</sup>  
16  
17

18 59 In this study, we subjected new BZDs users who continued the drugs for  $\geq 8$   
19  
20  
21 60 consecutive months. This definition was selected based on two previous studies. In a  
22  
23  
24 61 systematic review, long-term BZD use was commonly defined as 6-12 months. <sup>11</sup> In  
25  
26  
27 62 another study, about a half of patients who used BZDs for 8 months experienced clear  
28  
29  
30 63 withdrawal symptoms. <sup>14</sup>  
31  
32

33 64 Using a large-scale health insurance database with detailed prescription  
34  
35  
36 65 information, the present study investigated the proportion of long-term BZD  
37  
38  
39 66 prescription among new BZD users in Japan with a retrospective cohort design. We also  
40  
41  
42 67 assessed examined factors associated with the long-term prescription.  
43  
44

45 68

## 48 69 **Methods**

### 51 70 **Data source**

52  
53  
54 71 We used a health insurance claims database provided by JMDC Inc., Tokyo, Japan.

55  
56  
57 72 JMDC Inc. has collected claims information from occupation-based health insurance  
58  
59  
60

1  
2  
3  
4  
5  
6 73 agencies for corporate employees and their dependents since 2005.<sup>15</sup> The JMDC  
7  
8  
9 74 database includes anonymous data of inpatient, outpatient, and pharmacy claims and  
10  
11  
12 75 special health checkups from about 3,000,000 individuals by November 2014,  
13  
14  
15 76 representing about 2.5% of the Japanese population.<sup>16</sup> Each record includes age, sex,  
16  
17  
18 77 diagnoses, prescriptions, information of medical institution, and date of the services.  
19  
20  
21 78 The diagnoses are based on International Classification of Diseases, 10th revision (ICD-  
22  
23  
24 79 10) diagnostic codes. The prescription information has the World Health Organization's  
25  
26  
27 80 Anatomical Therapeutic Chemical (WHO-ATC) classification system codes, drug  
28  
29  
30 81 name, dosage, days of supply, and mode of prescription. Date of prescriptions has been  
31  
32  
33 82 recorded since April 1st 2012. We thus used the data from April 1st 2012 through  
34  
35  
36 83 December 31st 2015. The requirement for informed consent was waived because of the  
37  
38  
39 84 anonymous nature of the data. The study was approved by the Institutional Review  
40  
41  
42 85 Board of The University of Tokyo.  
43  
44

45 86

### 48 87 **Patient selection**

49  
50  
51 88 We selected outpatients aged 18 to 65 years who started at least one of available oral  
52  
53  
54 89 BZD and BZD-related drugs between October 1st 2012 and April 1st 2015  
55  
56  
57 90 (Supplementary table). We chose only subjects who had been continuously enrolled in  
58  
59  
60



1  
2  
3  
4  
5  
6  
7 91 the JMDC database for at least six months before first prescription of BZDs. We  
8  
9 92 defined first users as those who had not used any BZDs for this six-month baseline  
10  
11  
12 93 period (Figure 1). We excluded patients who were followed up for less than 8 months  
13  
14  
15 94 after the first BZD prescription. We also excluded those who underwent surgery on the  
16  
17  
18 95 day of the first BZD prescription. Surgeries were identified with Japanese original  
19  
20  
21 96 procedure codes. When extracting BZDs, we used the WHO-ATC codes N05BA,  
22  
23  
24 97 N05CD, N05CF, and N03AE.<sup>17</sup> We added seven BZDs which were not covered by the  
25  
26  
27 98 WHO-ATC codes but were available in Japan. We excluded clobazam from this study  
28  
29  
30 99 because it was categorized as benzodiazepine-derivative anxiolytics in the WHO-ATC  
31  
32  
33 100 code (N05BA09) but was used as an antiepileptic in Japan. Thirty-two BZDs were  
34  
35  
36 101 identified.

37  
38  
39 102 ---Figure 1---

40  
41  
42 103

#### 43 44 45 104 **Definition of long-term BZD prescription**

46  
47  
48 105 We defined long-term BZD users as those who received at least one prescription of any  
49  
50  
51 106 BZDs every month for  $\geq 8$  consecutive months.

52  
53  
54 107

#### 55 56 57 108 **Potential predictors of long-term BZD prescription**

1  
2  
3  
4  
5  
6  
7 109 We assessed the following variables at baseline period as potential predictors of long-  
8  
9  
10 110 term BZD use based on previous studies. Patient characteristics included sex, age,  
11  
12 111 working status (worker or dependent), diagnosis of cancer (ICD-10 code, C\$), and  
13  
14  
15 112 psychiatric diagnosis (no diagnosis, mood disorders only [F3], neurotic, stress-related  
16  
17  
18 113 and somatic disorders only [F4], both mood disorder and neurotic disorder [F3 and F4],  
19  
20  
21 114 and other psychiatric disorders [F0, 1, 5-9]. Physician's specialty (psychiatry or others)  
22  
23  
24 115 was also evaluated. Pharmacological characteristics of the first BZD prescription  
25  
26  
27 116 included type of BZD (hypnotics only, anxiolytics only, or both), half-life of BZD  
28  
29  
30 117 (short: <12 hours, medium: 12-24 hours, long:  $\geq$ 24 hours), administration instruction  
31  
32  
33 118 (regular, as needed, or both), and the number of BZDs. If a patient was prescribed  
34  
35  
36 119 multiple BZDs with different half-lives, we selected the BZD with the longest half-life.  
37  
38

39  
40 120

## 41 42 121 **Statistical analyses**

43  
44  
45 122 First, we calculated proportion of long-term use of BZD and compared the potential  
46  
47  
48 123 predictors of long-term prescription between the patients who were prescribed BZDs for  
49  
50  
51 124  $\geq$ 8 and <8 months. We used Student's t-test to compare the average of continuous  
52  
53  
54 125 variables (such as age) and chi-squared test to compare the proportion of categorical  
55  
56  
57 126 variables (such as sex). Next, a multivariable logistic regression was performed to  
58  
59  
60

1  
2  
3  
4  
5  
6 127 assess the association between the potential predictors and long-term prescription.  
7  
8

9 128 The threshold for significance was  $P < 0.05$ . We used IBM SPSS version 23  
10  
11  
12 129 (IBM, Armonk, NY, USA) for all statistical analyses.  
13  
14

15 130

## 18 131 **Results**

### 21 132 **Patient characteristics**

23  
24 133 A total 88,001 patients were identified as new BZD users during the study period  
25  
26  
27 134 (Figure 2). After excluding patients without eight months follow-up ( $n = 12,325$ ), and  
28  
29  
30 135 patients who underwent surgery on the day of first BZD prescription ( $n = 3,721$ ), 71,955  
31  
32  
33 136 patients were included in the analysis. There were 6,462 patients (9.0%) who were  
34  
35  
36 137 prescribed BZDs for  $\geq 8$  consecutive months. When stratified by gender, 10.7% of males  
37  
38  
39 138 and 7.2% of females continued BZD use for  $\geq 8$  months. As for age group, the  
40  
41  
42 139 proportion of long-term use was 8.9%, 9.3%, 9.5%, 8.6%, and 9.0% for subjects aged  
43  
44  
45 140 18-29, 30-39, 40-49, 50-59, and 60-65, respectively. Table 1 shows patient  
46  
47  
48 141 characteristics, information of physicians, and pharmacological characteristics of the  
49  
50  
51 142 initial prescription. About half of them were diagnosed with mood disorder, and  
52  
53  
54 143 hypnotics were more likely to be prescribed than anxiolytics.

55  
56  
57 144 ---Figure 2---

1  
2  
3  
4  
5  
6  
7 145 ---Table 1---

8  
9 146 Table 1 Demographic and clinical characteristics of the new users of benzodiazepines (N  
10 147 = 71,955)

|                                                | BZD < 8 month<br>n = 65,493 (91.0 %) | BZD ≥8 month<br>n = 6462 (9.0 %) | P value |
|------------------------------------------------|--------------------------------------|----------------------------------|---------|
| Age, mean (SD)                                 | 42.3 (11.8)                          | 42.0 (11.3)                      | 0.016   |
| Sex, male                                      | 33,072 (50.5)                        | 3959 (61.3)                      | < 0.001 |
| Working status, workers                        | 42,131 (64.3)                        | 4649 (71.9)                      | < 0.001 |
| Cancer                                         | 6875 (10.5)                          | 673 (10.4)                       | 0.853   |
| Medical specialty, psychiatry                  | 6876 (10.5)                          | 3887 (60.2)                      | < 0.001 |
| Psychiatric diagnosis                          |                                      |                                  | < 0.001 |
| None                                           | 28,175 (43.0)                        | 1275 (19.7)                      |         |
| Mood disorders                                 | 8958 (13.7)                          | 2170 (33.6)                      |         |
| Neurotic, stress-related and somatic disorders | 20,891 (31.9)                        | 1386 (21.4)                      |         |
| Mood and neurotic disorders                    | 6262 (9.6)                           | 1433 (22.2)                      |         |
| Other disorders                                | 1207 (1.8)                           | 198 (3.1)                        |         |
| Type of BZD                                    |                                      |                                  | < 0.001 |
| Hypnotic                                       | 18,413 (28.1)                        | 2187 (33.8)                      |         |
| Anxiolytic                                     | 42,809 (65.4)                        | 3038 (47.0)                      |         |
| Both                                           | 4271 (6.5)                           | 1237 (19.1)                      |         |
| Half-life of BZD                               |                                      |                                  | < 0.001 |
| Short (< 12 h)                                 | 42,392 (64.7)                        | 3609 (55.8)                      |         |
| Medium (12-24 h)                               | 10,233 (15.6)                        | 1512 (23.4)                      |         |
| Long (≤ 24 h)                                  | 12,868 (19.6)                        | 1341 (20.8)                      |         |
| Administration instruction                     |                                      |                                  | < 0.001 |
| Regular                                        | 45,959 (70.2)                        | 4926 (76.2)                      |         |
| As needed                                      | 17,122 (26.1)                        | 938 (14.5)                       |         |
| Both                                           | 2412 (3.7)                           | 598 (9.3)                        |         |
| Number of BZD, mean (SD)                       | 1.1 (0.4)                            | 1.3 (0.6)                        | < 0.001 |

142 148 Data presented as n (%) unless otherwise specified.

143 149 BZD, benzodiazepine-related drugs; SD, standard deviation.

144 150

145 151

## 152 **Predictors of long-term prescription**

153 153 Table 2 shows the result of the multivariable logistic regression. Patients with cancer

154 154 had significantly higher risk of long-term BZD prescription than those without cancer

155 (odds ratio, 1.19; 95% confidence interval, 1.09-1.31;  $p < 0.001$ ). Half-life of BZDs was  
 156 not associated with long-term BZD prescription.

157 ---Table 2---

158 Table 2 Factors related to long-term benzodiazepine prescription among the new users of  
 159 benzodiazepines (N = 71,955)

| Variables                                      | OR   | 95% CI       | P value |
|------------------------------------------------|------|--------------|---------|
| Age                                            | 1.02 | 1.01 to 1.02 | <0.001  |
| Sex, male                                      | 1.12 | 1.04 to 1.21 | <0.001  |
| Working status, workers                        | 0.98 | 0.90 to 1.05 | 0.53    |
| Cancer                                         | 1.19 | 1.09 to 1.31 | <0.001  |
| Medical specialty, psychiatry                  | 2.04 | 1.88 to 2.20 | <0.001  |
| Psychiatric diagnosis                          |      |              |         |
| None                                           | Ref. |              |         |
| Mood disorders                                 | 2.98 | 2.70 to 3.29 | <0.001  |
| Neurotic, stress-related and somatic disorders | 1.42 | 1.30 to 1.55 | <0.001  |
| Mood and neurotic disorders                    | 3.22 | 2.90 to 3.58 | <0.001  |
| Other disorders                                | 2.26 | 1.91 to 2.69 | <0.001  |
| Type of BZD                                    |      |              |         |
| Hypnotic                                       | Ref. |              |         |
| Anxiolytic                                     | 0.61 | 0.57 to 0.66 | <0.001  |
| Both                                           | 0.86 | 0.76 to 0.98 | 0.02    |
| Half-life of BZD                               |      |              |         |
| Short (< 12 h)                                 | Ref. |              |         |
| Medium (12-24 h)                               | 1.04 | 0.96 to 1.12 | 0.34    |
| Long ( $\leq$ 24 h)                            | 0.95 | 0.88 to 1.03 | 0.22    |
| Administration instruction                     |      |              |         |
| Regular                                        | Ref. |              |         |
| As needed                                      | 0.53 | 0.49 to 0.57 | <0.001  |
| Both                                           | 0.93 | 0.82 to 1.05 | 0.23    |
| Number of BZD                                  | 1.32 | 1.21 to 1.45 | <0.001  |

160 BZD, benzodiazepine-related drugs; CI, confidence interval; OR, odds ratio

161

## 162 Discussion

163 Using a large health insurance claims database, we investigated the proportion of long-  
 164 term BZD prescription among new BZD users aged 18 to 65 years. A total of 9.0%

1  
2  
3  
4  
5  
6 165 continued BZDs for  $\geq 8$  months. Long-term BZD prescription was significantly  
7  
8  
9 166 associated with older age, cancer, comorbidity of mood and neurotic disorder,  
10  
11  
12 167 hypnotics, prescription at psychiatry, and high-dose of BZD at the initial prescription.  
13  
14  
15 168 The half-life of BZD was not associated with long-term prescription.  
16  
17

18  
19 169 This study showed 9% of new users continued BZDs for  $\geq 8$  months. This figure  
20  
21 170 was comparable to that in a previous study<sup>11</sup> but relatively lower than prevalence in  
22  
23  
24 171 most of previous studies.<sup>10,18-20</sup> Also, previous studies using prevalent user design  
25  
26  
27 172 caused overestimation of the long-term BZD use. In this study, prevalence of long-term  
28  
29  
30 173 prescription in non-elderly population may be more reliable because we assessed BZD  
31  
32  
33 174 use for  $\geq 8$  consecutive months. Alternatively, low prevalence may be due to  
34  
35  
36 175 development of guidelines for BZDs. The guidelines restricting long-term BZD  
37  
38  
39 176 prescription, such as the UK National Institute for Health and Care Excellence  
40  
41  
42 177 guideline, were developed and spread around the world since 2000's. These guidelines  
43  
44  
45 178 may have affected physicians' prescription practice. Furthermore, the guidelines  
46  
47  
48 179 potentially affected patients' prescription preference because the information had been  
49  
50  
51 180 available on the Internet.  
52  
53

54 181 Some risk factors for long-term use, including older age, psychiatric disorders,  
55  
56  
57 182 users of hypnotics, regular prescription, a large number of BZD, and psychiatrist-

1  
2  
3  
4  
5  
6 183 prescriber were consistent with those in a previous study in Japan.<sup>12</sup> Patients with more  
7  
8  
9 184 severe condition may consult psychiatrists, be diagnosed with one or more psychiatric  
10  
11  
12 185 disorders and be prescribed a high dose of BZD for regular use. Although severe  
13  
14  
15 186 conditions may cause long-term use of BZDs, BZDs should be prescribed with caution  
16  
17  
18 187 because there is weak evidence for efficacy of the long-term BZD use and BZD is not  
19  
20  
21 188 the first-line treatment for depression and anxiety. Half-life of BZD was not associated  
22  
23  
24 189 with long-term use in this study, although many studies illustrated risk of short-acting  
25  
26  
27 190 BZD.<sup>21,22</sup> Since 2000, when benzodiazepine-related hypnotics became popular, studies  
28  
29  
30 191 had focused on effect of half-life of BZD on long-term BZD prescription, but evidence  
31  
32  
33 192 remained inconclusive.<sup>11</sup> Differences in population characteristics may have resulted in  
34  
35  
36 193 the inconsistent study results of short-acting BZD. Our results suggested that among the  
37  
38  
39 194 relatively young and healthy population, half-life of BZD did not play an important role  
40  
41  
42 195 in long-term prescription as previously considered. Further study is required to evaluate  
43  
44  
45 196 effect of half-life of BZD on long-term prescription in population with deferent  
46  
47  
48 197 characteristics.

51 198 Patients with cancer at baseline were likely to continue BZD in this study.

54 199 Patients with cancer may use and continue BZD because of pain and psychological

57 200 distress,<sup>10,13,23</sup> especially among non-elderly adults.<sup>24,25</sup> Moreover, patients with cancer

1  
2  
3  
4  
5  
6 201 likely have these symptoms during and even after cancer treatment. It is important to  
7  
8  
9 202 manage pain and psychological distress by other measures to prevent additional adverse  
10  
11  
12 203 effect from long-term use of BZD among cancer patients.  
13  
14

15 204 Based on our findings, it is important to carefully prescribe BZD in accordance  
16  
17  
18 205 with the recommendation to avoid long-term use, especially for patients with dual  
19  
20  
21 206 diagnosis of mood and neurotic disorder, using hypnotics, prescribed two or more  
22  
23  
24 207 BZDs, and with cancer. Prescription guidelines of BZD such as NICE guideline and  
25  
26  
27 208 WHO recommend using BZD up to 30 days.<sup>26,27</sup> In Japan, year-long prescription of  
28  
29  
30 209 BZD was disincentivized in 2018.<sup>28</sup> However, this may not be enough to prevent long-  
31  
32  
33 210 term BZD use because most of BZD users may already be dependent on BZDs by one  
34  
35  
36 211 year. Additional measure should be taken to restrict BZD prescription. For example, an  
37  
38  
39 212 option may be to disincentivize prescription of high-dose BZD at initial prescription or  
40  
41  
42 213 continuation BZD for more than one month based on patient' severity of psychiatric  
43  
44  
45 214 disorders.  
46  
47

48 215 This study had several limitations related to claimed data. The data did not  
49  
50  
51 216 include severity of psychiatric disorders and insomnia. If people with severe condition  
52  
53  
54 217 quitted their job and change health insurance, they dropped out from this study cohort.  
55  
56  
57 218 Although rare among the new users, this may have influenced characteristics of the  
58  
59  
60



1  
2  
3  
4  
5  
6 219 study cohort. Moreover, the elderly and unemployed people were not included in this  
7  
8  
9 220 study.

10  
11  
12 221

## 13 14 15 222 **Conclusion**

16  
17  
18 223 We identified several risk factors for determining long-term prescription of  
19  
20  
21 224 BZD among new users of BZD. Although prevalence of long-term users was relatively  
22  
23  
24 225 low, assessment of these risk factors is necessary to prevent long-term prescription of  
25  
26  
27 226 BZDs when physicians prescribe BZD at initial visit.

28  
29  
30 227

## 31 32 33 228 **Author contributions**

34  
35  
36 229 AT, SO, Hayato Y, and Hideo Y devised the study protocol. AT, SO, and Hayato Y  
37  
38  
39 230 drafted the manuscript. All authors reviewed and approved the final manuscript.

40  
41  
42 231

## 43 44 45 232 **Funding statement**

46  
47  
48 233 This research was supported by the Ministry of Health, Labour and Welfare, Japan; and  
49  
50  
51 234 The Health Care Science Institute, Japan.

52  
53  
54 235

## 55 56 57 236 **Competing interests**

1  
2  
3  
4  
5  
6 237 The authors declare no conflict of interest.  
7  
8

9 238

10  
11  
12 239 **Data sharing statement**  
13

14  
15 240 No additional data sharing available  
16  
17

18 241

19  
20  
21 242 **References**  
22

23  
24 243 1. Soyka M. Treatment of Benzodiazepine Dependence. *N Engl J Med.* 2017; **376**:  
25

26  
27 244 1147–57.  
28

29  
30 245 2. Inada T, Inagaki A. Psychotropic dose equivalence in Japan. *Psychiatry Clin.*  
31

32  
33 246 *Neurosci.* 2015; **69**: 440–7.  
34

35  
36 247 3. Petursson H. The benzodiazepine withdrawal syndrome. *Addiction.* 1994; **89**:  
37

38  
39 248 1455–9.  
40

41  
42 249 4. Islam MM, Iqbal U, Walther B, Atique S, Dubey NK, Nguyen P-A, et al.  
43

44  
45 250 Benzodiazepine Use and Risk of Dementia in the Elderly Population: A  
46

47  
48 251 Systematic Review and Meta-Analysis. *Neuroepidemiology.* 2016; **47**:181–91.  
49

50  
51 252 5. Zhong GC, Wang Y, Zhang Y, Zhao Y. Association between benzodiazepine use  
52

53  
54 253 and dementia: A meta-analysis. *PLoS One.* 2015; **10**: e0127836.  
55

56  
57 254 6. Donnelly K, Bracchi R, Hewitt J, Routledge PA, Carter B. Benzodiazepines, Z-  
58  
59  
60

- 1  
2  
3  
4  
5  
6 255 drugs and the risk of hip fracture: A systematic review and meta- analysis. *PLoS*  
7  
8  
9 256 *One.* 2017; **12**: e0174730.  
10  
11  
12 257 7. Weich S, Pearce HL, Croft P, Singh S, Crome I, Bashford J, et al. Effect of  
13  
14  
15 258 anxiolytic and hypnotic drug prescriptions on mortality hazards: Retrospective  
16  
17  
18 259 cohort study. *BMJ.* 2014; **348**: 1–12.  
19  
20  
21 260 8. Kim H-B, Myung S-K, Park YC, Park B. Use of benzodiazepine and risk of  
22  
23  
24 261 cancer: A meta-analysis of observational studies. *Int J Cancer.* 2017; **140**: 513–  
25  
26  
27 262 25.  
28  
29  
30 263 9. Elvik R. Risk of road accident associated with the use of drugs: A systematic  
31  
32  
33 264 review and meta-analysis of evidence from epidemiological studies. *Accid. Anal.*  
34  
35  
36 265 *Prev.* 2013; **60**: 254–67.  
37  
38  
39 266 10. Fang S-Y, Chen C-Y, Chang I-S, Wu EC-H, Chang C-M, Lin K-M. Predictors of  
40  
41  
42 267 the incidence and discontinuation of long-term use of benzodiazepines: A  
43  
44  
45 268 population-based study. *Drug Alcohol Depend.* 2009; **104**: 140–6.  
46  
47  
48 269 11. Kurko TAT, Saastamoinen LK, Tähkäpää S, Tuulio-Henriksson A, Taiminen T,  
49  
50  
51 270 Tiihonen J, et al. Long-term use of benzodiazepines: Definitions, prevalence and  
52  
53  
54 271 usage patterns – a systematic review of register-based studies. *Eur. Psychiatry.*  
55  
56  
57 272 2015; **30**: 1037–47.  
58  
59  
60

- 1  
2  
3  
4  
5  
6 273 12. Takeshima N, Ogawa Y, Hayasaka Y, Furukawa TA. Continuation and  
7  
8  
9 274 discontinuation of benzodiazepine prescriptions: A cohort study based on a large  
10  
11  
12 275 claims database in Japan. *Psychiatry Res.* 2016; **237**: 201–7.  
13  
14  
15 276 13. Simon GE, Vonkorff M, Barlow W, Pabiniak C, Wagner E. Predictors of Chronic  
16  
17  
18 277 Benzodiazepine Use in a Health Maintenance Organization Sample. *J Clin*  
19  
20  
21 278 *Epidemiol.* 1996; **49**: 1067–73.  
22  
23  
24 279 14. Rickels K, Case WG, Downing RW, Winokur A. Long-term Diazepam Therapy  
25  
26  
27 280 and Clinical Outcome. *JAMA.* 1983 ;**250**: 767-71.  
28  
29  
30 281 15. Kimura S, Sato T, Ikeda S, Noda M, Nakayama T. Development of a Database of  
31  
32  
33 282 Health Insurance Claims: Standardization of Disease Classifications and  
34  
35  
36 283 Anonymous Record Linkage. *J. Epidemiol.* 2010; **20**: 413–9.  
37  
38  
39 284 16. JMDC Inc. [Feature of JMDC Claims Database]. [Cited 18 Nov 2018.]  
40  
41  
42 285 Available from <https://www.jmdc.co.jp/pharma/database.html> (in Japanese)  
43  
44  
45 286 17. WHOCC - ATC/DDD Index. [Cited 18 Nov 2018.] Available from  
46  
47  
48 287 [https://www.whooc.no/atc\\_ddd\\_index/](https://www.whooc.no/atc_ddd_index/)  
49  
50  
51 288 18. Cunningham CM, Hanley GE, Morgan S. Patterns in the use of benzodiazepines  
52  
53  
54 289 in British Columbia: Examining the impact of increasing research and guideline  
55  
56  
57 290 cautions against long-term use. *Health Policy.* 2010; **97**:122–9.  
58  
59  
60

- 1  
2  
3  
4  
5  
6 291 19. Isacson D. Long-term benzodiazepine use: Factors of importance and the  
7  
8  
9 292 development of individual use patterns over time—A 13-year follow-up in a  
10  
11  
12 293 Swedish community. *Soc. Sci. Med.* 1997; **44**:1871–80.  
13  
14  
15 294 20. van Hulten R, Isacson D, Bakker A, Leufkens HG. Comparing patterns of long-  
16  
17  
18 295 term benzodiazepine use between a Dutch and a Swedish community.  
19  
20  
21 296 *Pharmacoepidemiol Drug Saf.* 2003 ;**12**: 49–53.  
22  
23  
24 297 21. Hallfors DD, Saxe L. The dependence potential of short half-life  
25  
26  
27 298 benzodiazepines: a meta-analysis. *Am J Public Health.* 1993; **83**: 1300–4.  
28  
29  
30 299 22. Owen RT, Tyrer P. Benzodiazepine Dependence A Review of the Evidence.  
31  
32  
33 300 *Drug.* 1983; **25** :385–98.  
34  
35  
36 301 23. Luijendijk HJ, Tiemeier H, Hofman A, Heeringa J, Stricker BHC. Determinants  
37  
38  
39 302 of chronic benzodiazepine use in the elderly: A longitudinal study. *Br J Clin*  
40  
41  
42 303 *Pharmacol.* 2008; **65**: 593–9.  
43  
44  
45 304 24. Mehta RD, Roth AJ. Psychiatric considerations in the oncology setting. *CA*  
46  
47  
48 305 *Cancer J Clin.* 2015; **65**: 299–314.  
49  
50  
51 306 25. Miovic M, Block S. Psychiatric disorders in advanced cancer. *Cancer.* 2007; **110**:  
52  
53  
54 307 1665–76.  
55  
56  
57 308 26. NICE. Hypnotics | Guidance and guidelines |. [Cited 18 Nov 2018.] Available  
58  
59  
60

- 1  
2  
3  
4  
5  
6  
7 309 from <https://www.nice.org.uk/advice/ktt6/chapter/evidence-context>  
8  
9 310 27. WHO. Programme on Substance Abuse. Rational use of benzodiazepines. 1996  
10  
11  
12 311 [Cited 18 Nov 2018.] Available from  
13  
14  
15 312 [http://apps.who.int/iris/bitstream/handle/10665/65947/WHO\\_PSA\\_96.11.pdf?seq](http://apps.who.int/iris/bitstream/handle/10665/65947/WHO_PSA_96.11.pdf?sequence=1&isAllowed=y)  
16  
17  
18 313 [uence=1&isAllowed=y](http://apps.who.int/iris/bitstream/handle/10665/65947/WHO_PSA_96.11.pdf?sequence=1&isAllowed=y)  
19  
20  
21 314 28. Ministry of Health, Labour and Welfare. [Revision of Medical Fees in 2018  
22  
23  
24 315 (medical treatment and pharmaceutical)]. [Cited 18 Nov 2018.] Available from  
25  
26  
27 316 [http://www.mhlw.go.jp/file/06-Seisakujouhou-12400000-](http://www.mhlw.go.jp/file/06-Seisakujouhou-12400000-Hokenkyoku/0000196430.pdf)  
28  
29  
30 317 [Hokenkyoku/0000196430.pdf](http://www.mhlw.go.jp/file/06-Seisakujouhou-12400000-Hokenkyoku/0000196430.pdf) (in Japanese)  
31  
32  
33 318  
34  
35  
36  
37  
38  
39  
40  
41  
42  
43  
44  
45  
46  
47  
48  
49  
50  
51  
52  
53  
54  
55  
56  
57  
58  
59  
60

1  
2  
3  
4  
5  
6  
7  
8  
9  
10  
11  
12  
13  
14  
15  
16  
17  
18  
19  
20  
21  
22  
23  
24  
25  
26  
27  
28  
29  
30  
31  
32  
33  
34  
35  
36  
37  
38  
39  
40  
41  
42  
43  
44  
45  
46  
47  
48  
49  
50  
51  
52  
53  
54  
55  
56  
57  
58  
59  
60

For peer review only

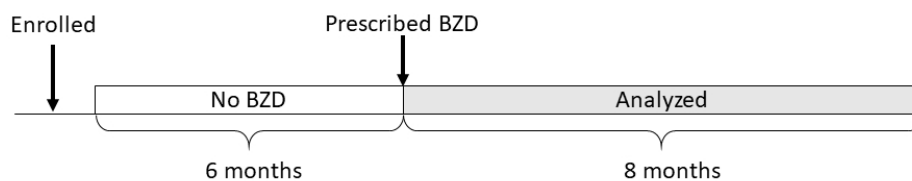

Figure 1 Patient selection

Figure 1 Patient selection

254x190mm (96 x 96 DPI)



1  
2  
3  
4  
5  
6  
7  
8  
9  
10  
11  
12  
13  
14  
15  
16  
17  
18  
19  
20  
21  
22  
23  
24  
25  
26  
27  
28  
29  
30  
31  
32  
33  
34  
35  
36  
37  
38  
39  
40  
41  
42  
43  
44  
45  
46  
47  
48  
49  
50  
51  
52  
53  
54  
55  
56  
57  
58  
59  
60

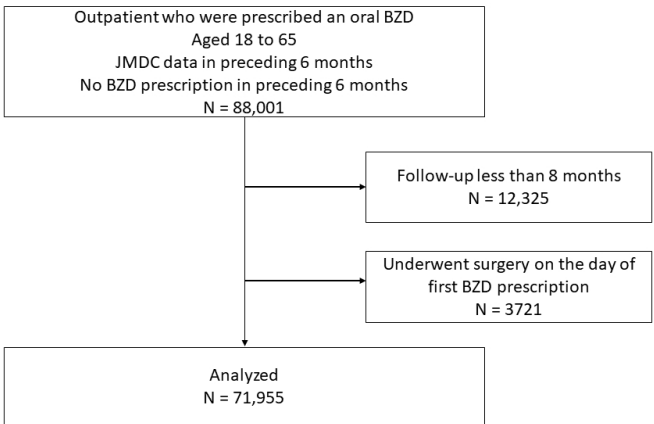

Figure 2 Participant flow

Figure 2 Patient flow

338x190mm (96 x 96 DPI)

Supporting Table 1 List of benzodiazepine and benzodiazepine-related drugs included in this study

|                                                   | ATC code    | Generic name          |
|---------------------------------------------------|-------------|-----------------------|
| benzodiazepine-derivative anxiolytics             |             |                       |
| 1                                                 | N05BA01     | diazepam              |
| 2                                                 | N05BA02     | chlordiazepoxide      |
| 3                                                 | N05BA03     | medazepam             |
| 4                                                 | N05BA05     | potassium clorazepate |
| 5                                                 | N05BA06     | lorazepam             |
| 6                                                 | N05BA08     | bromazepam            |
| 7                                                 | N05BA12     | alprazolam            |
| 8                                                 | N05BA17     | fludiazepam           |
| 9                                                 | N05BA18     | ethyl loflazepate     |
| 10                                                | N05BA19     | etizolam              |
| 11                                                | N05BA21     | clotiazepam           |
| 12                                                | N05BA22     | cloxazolam            |
| 13                                                | N05BA23     | tofisopam             |
| benzodiazepine-derivative hypnotics and sedatives |             |                       |
| 14                                                | N05CD01     | flurazepam            |
| 15                                                | N05CD02     | nitrazepam            |
| 16                                                | N05CD03     | flunitrazepam         |
| 17                                                | N05CD04     | estazolam             |
| 18                                                | N05CD05     | triazolam             |
| 19                                                | N05CD06     | lormetazepam          |
| 20                                                | N05CD09     | brotizolam            |
| 21                                                | N05CD10     | quazepam              |
| Z-drugs                                           |             |                       |
| 22                                                | N05CF01     | zopiclone             |
| 23                                                | N05CF02     | zolpidem              |
| 24                                                | N05CF04     | eszopiclone           |
| benzodiazepine-derivative antiepileptics          |             |                       |
| 25                                                | N03AE01     | clonazepam            |
| Other (not covered by the WHO-ATC code)           |             |                       |
| 26                                                | anxiolytics | flutazolam            |
| 27                                                | anxiolytics | flutoprazepam         |
| 28                                                | anxiolytics | mexazolam             |
| 29                                                | anxiolytics | oxazolam              |
| 30                                                | hypnotics   | nimetazepam           |
| 31                                                | hypnotics   | haloxazolam           |
| 32                                                | hypnotics   | rilmazafone           |

WHO-ATC: the World Health Organization's Anatomical Therapeutic Chemical

# Reporting checklist for cohort study.

Based on the STROBE cohort guidelines.

## Instructions to authors

Complete this checklist by entering the page numbers from your manuscript where readers will find each of the items listed below.

Your article may not currently address all the items on the checklist. Please modify your text to include the missing information. If you are certain that an item does not apply, please write "n/a" and provide a short explanation.

Upload your completed checklist as an extra file when you submit to a journal.

In your methods section, say that you used the STROBE cohort reporting guidelines, and cite them as:

von Elm E, Altman DG, Egger M, Pocock SJ, Gøtzsche PC, Vandenbroucke JP. The Strengthening the Reporting of Observational Studies in Epidemiology (STROBE) Statement: guidelines for reporting observational studies.

|          |     | Reporting Item                                                                                  | Page Number |
|----------|-----|-------------------------------------------------------------------------------------------------|-------------|
| Title    | #1a | Indicate the study's design with a commonly used term in the title or the abstract              | 1           |
| Abstract | #1b | Provide in the abstract an informative and balanced summary of what was done and what was found | 2-3         |

|    |                      |     |                                                                   |          |
|----|----------------------|-----|-------------------------------------------------------------------|----------|
| 1  | Background /         | #2  | Explain the scientific background and rationale for the           | 3-5      |
| 2  |                      |     |                                                                   |          |
| 3  | rationale            |     | investigation being reported                                      |          |
| 4  |                      |     |                                                                   |          |
| 5  |                      |     |                                                                   |          |
| 6  | Objectives           | #3  | State specific objectives, including any prespecified             | 5        |
| 7  |                      |     | hypotheses                                                        |          |
| 8  |                      |     |                                                                   |          |
| 9  |                      |     |                                                                   |          |
| 10 |                      |     |                                                                   |          |
| 11 | Study design         | #4  | Present key elements of study design early in the paper           | 5        |
| 12 |                      |     |                                                                   |          |
| 13 |                      |     |                                                                   |          |
| 14 |                      |     |                                                                   |          |
| 15 | Setting              | #5  | Describe the setting, locations, and relevant dates, including    | 5-7      |
| 16 |                      |     | periods of recruitment, exposure, follow-up, and data collection  |          |
| 17 |                      |     |                                                                   |          |
| 18 |                      |     |                                                                   |          |
| 19 |                      |     |                                                                   |          |
| 20 | Eligibility criteria | #6a | Give the eligibility criteria, and the sources and methods of     | 5-7, Fig |
| 21 |                      |     | selection of participants. Describe methods of follow-up.         | 1        |
| 22 |                      |     |                                                                   |          |
| 23 |                      |     |                                                                   |          |
| 24 |                      |     |                                                                   |          |
| 25 |                      |     |                                                                   |          |
| 26 |                      | #6b | For matched studies, give matching criteria and number of         | NA       |
| 27 |                      |     | exposed and unexposed                                             |          |
| 28 |                      |     |                                                                   |          |
| 29 |                      |     |                                                                   |          |
| 30 |                      |     |                                                                   |          |
| 31 | Variables            | #7  | Clearly define all outcomes, exposures, predictors, potential     | 7-8      |
| 32 |                      |     | confounders, and effect modifiers. Give diagnostic criteria, if   |          |
| 33 |                      |     | applicable                                                        |          |
| 34 |                      |     |                                                                   |          |
| 35 |                      |     |                                                                   |          |
| 36 |                      |     |                                                                   |          |
| 37 |                      |     |                                                                   |          |
| 38 |                      |     |                                                                   |          |
| 39 | Data sources /       | #8  | For each variable of interest give sources of data and details of | 5        |
| 40 | measurement          |     | methods of assessment (measurement). Describe                     |          |
| 41 |                      |     | comparability of assessment methods if there is more than one     |          |
| 42 |                      |     | group. Give information separately for for exposed and            |          |
| 43 |                      |     | unexposed groups if applicable.                                   |          |
| 44 |                      |     |                                                                   |          |
| 45 |                      |     |                                                                   |          |
| 46 |                      |     |                                                                   |          |
| 47 |                      |     |                                                                   |          |
| 48 |                      |     |                                                                   |          |
| 49 |                      |     |                                                                   |          |
| 50 |                      |     |                                                                   |          |
| 51 | Bias                 | #9  | Describe any efforts to address potential sources of bias         | 6        |
| 52 |                      |     |                                                                   |          |
| 53 |                      |     |                                                                   |          |
| 54 | Study size           | #10 | Explain how the study size was arrived at                         | 5-6      |
| 55 |                      |     |                                                                   |          |
| 56 |                      |     |                                                                   |          |
| 57 | Quantitative         | #11 | Explain how quantitative variables were handled in the            | 7-8      |
| 58 |                      |     |                                                                   |          |
| 59 |                      |     |                                                                   |          |
| 60 |                      |     |                                                                   |          |

|    |                  |                                                                        |       |
|----|------------------|------------------------------------------------------------------------|-------|
| 1  | variables        | analyses. If applicable, describe which groupings were chosen,         |       |
| 2  |                  |                                                                        |       |
| 3  |                  | and why                                                                |       |
| 4  |                  |                                                                        |       |
| 5  |                  |                                                                        |       |
| 6  | Statistical      | #12a Describe all statistical methods, including those used to control | 8-9   |
| 7  |                  |                                                                        |       |
| 8  | methods          | for confounding                                                        |       |
| 9  |                  |                                                                        |       |
| 10 |                  |                                                                        |       |
| 11 |                  | #12b Describe any methods used to examine subgroups and                | NA    |
| 12 |                  |                                                                        |       |
| 13 |                  | interactions                                                           |       |
| 14 |                  |                                                                        |       |
| 15 |                  |                                                                        |       |
| 16 |                  | #12c Explain how missing data were addressed                           | NA    |
| 17 |                  |                                                                        |       |
| 18 |                  |                                                                        |       |
| 19 |                  | #12d If applicable, explain how loss to follow-up was addressed        | NA    |
| 20 |                  |                                                                        |       |
| 21 |                  |                                                                        |       |
| 22 |                  | #12e Describe any sensitivity analyses                                 | NA    |
| 23 |                  |                                                                        |       |
| 24 |                  |                                                                        |       |
| 25 |                  |                                                                        |       |
| 26 | Participants     | #13a Report numbers of individuals at each stage of study—eg           | 9     |
| 27 |                  |                                                                        |       |
| 28 |                  | numbers potentially eligible, examined for eligibility, confirmed      |       |
| 29 |                  |                                                                        |       |
| 30 |                  | eligible, included in the study, completing follow-up, and             |       |
| 31 |                  |                                                                        |       |
| 32 |                  | analysed. Give information separately for for exposed and              |       |
| 33 |                  |                                                                        |       |
| 34 |                  | unexposed groups if applicable.                                        |       |
| 35 |                  |                                                                        |       |
| 36 |                  |                                                                        |       |
| 37 |                  |                                                                        |       |
| 38 |                  | #13b Give reasons for non-participation at each stage                  | NA    |
| 39 |                  |                                                                        |       |
| 40 |                  |                                                                        |       |
| 41 |                  | #13c Consider use of a flow diagram                                    | Fig 2 |
| 42 |                  |                                                                        |       |
| 43 |                  |                                                                        |       |
| 44 | Descriptive data | #14a Give characteristics of study participants (eg demographic,       | 9     |
| 45 |                  |                                                                        |       |
| 46 |                  | clinical, social) and information on exposures and potential           |       |
| 47 |                  |                                                                        |       |
| 48 |                  | confounders. Give information separately for exposed and               |       |
| 49 |                  |                                                                        |       |
| 50 |                  | unexposed groups if applicable.                                        |       |
| 51 |                  |                                                                        |       |
| 52 |                  |                                                                        |       |
| 53 |                  |                                                                        |       |
| 54 |                  | #14b Indicate number of participants with missing data for each        | NA    |
| 55 |                  |                                                                        |       |
| 56 |                  | variable of interest                                                   |       |
| 57 |                  |                                                                        |       |
| 58 |                  |                                                                        |       |
| 59 |                  |                                                                        |       |
| 60 |                  |                                                                        |       |

|    |                  |      |                                                                      |          |
|----|------------------|------|----------------------------------------------------------------------|----------|
| 1  |                  | #14c | Summarise follow-up time (eg, average and total amount)              | NA       |
| 2  |                  |      |                                                                      |          |
| 3  |                  |      |                                                                      |          |
| 4  | Outcome data     | #15  | Report numbers of outcome events or summary measures                 | 9, Table |
| 5  |                  |      | over time. Give information separately for exposed and               | 1        |
| 6  |                  |      | unexposed groups if applicable.                                      |          |
| 7  |                  |      |                                                                      |          |
| 8  |                  |      |                                                                      |          |
| 9  |                  |      |                                                                      |          |
| 10 |                  |      |                                                                      |          |
| 11 | Main results     | #16a | Give unadjusted estimates and, if applicable, confounder-            | 10, Tabl |
| 12 |                  |      | adjusted estimates and their precision (eg, 95% confidence           | e 2      |
| 13 |                  |      | interval). Make clear which confounders were adjusted for and        |          |
| 14 |                  |      | why they were included                                               |          |
| 15 |                  |      |                                                                      |          |
| 16 |                  |      |                                                                      |          |
| 17 |                  |      |                                                                      |          |
| 18 |                  |      |                                                                      |          |
| 19 |                  |      |                                                                      |          |
| 20 |                  |      |                                                                      |          |
| 21 |                  |      |                                                                      |          |
| 22 |                  | #16b | Report category boundaries when continuous variables were            | 9-11     |
| 23 |                  |      | categorized                                                          |          |
| 24 |                  |      |                                                                      |          |
| 25 |                  |      |                                                                      |          |
| 26 |                  |      |                                                                      |          |
| 27 |                  |      |                                                                      |          |
| 28 |                  | #16c | If relevant, consider translating estimates of relative risk into    | NA       |
| 29 |                  |      | absolute risk for a meaningful time period                           |          |
| 30 |                  |      |                                                                      |          |
| 31 |                  |      |                                                                      |          |
| 32 | Other analyses   | #17  | Report other analyses done—e.g., analyses of subgroups and           | NA       |
| 33 |                  |      | interactions, and sensitivity analyses                               |          |
| 34 |                  |      |                                                                      |          |
| 35 |                  |      |                                                                      |          |
| 36 |                  |      |                                                                      |          |
| 37 |                  |      |                                                                      |          |
| 38 | Key results      | #18  | Summarise key results with reference to study objectives             | 11-12    |
| 39 |                  |      |                                                                      |          |
| 40 |                  |      |                                                                      |          |
| 41 | Limitations      | #19  | Discuss limitations of the study, taking into account sources of     | 14       |
| 42 |                  |      | potential bias or imprecision. Discuss both direction and            |          |
| 43 |                  |      | magnitude of any potential bias.                                     |          |
| 44 |                  |      |                                                                      |          |
| 45 |                  |      |                                                                      |          |
| 46 |                  |      |                                                                      |          |
| 47 |                  |      |                                                                      |          |
| 48 | Interpretation   | #20  | Give a cautious overall interpretation considering objectives,       | 12-14    |
| 49 |                  |      | limitations, multiplicity of analyses, results from similar studies, |          |
| 50 |                  |      | and other relevant evidence.                                         |          |
| 51 |                  |      |                                                                      |          |
| 52 |                  |      |                                                                      |          |
| 53 |                  |      |                                                                      |          |
| 54 |                  |      |                                                                      |          |
| 55 |                  |      |                                                                      |          |
| 56 | Generalisability | #21  | Discuss the generalisability (external validity) of the study        | 14       |
| 57 |                  |      |                                                                      |          |
| 58 |                  |      |                                                                      |          |
| 59 |                  |      |                                                                      |          |
| 60 |                  |      |                                                                      |          |

1 results

2  
3  
4 Funding #22 Give the source of funding and the role of the funders for the 15  
5 present study and, if applicable, for the original study on which  
6 the present article is based  
7  
8  
9

## 10 11 Author notes

12  
13  
14 The STROBE checklist is distributed under the terms of the Creative Commons Attribution License  
15 CC-BY. This checklist was completed on 03. February 2019 using <https://www.goodreports.org/>, a  
16  
17 tool made by the [EQUATOR Network](#) in collaboration with [Penelope.ai](#)  
18  
19  
20  
21  
22  
23  
24  
25  
26  
27  
28  
29  
30  
31  
32  
33  
34  
35  
36  
37  
38  
39  
40  
41  
42  
43  
44  
45  
46  
47  
48  
49  
50  
51  
52  
53  
54  
55  
56  
57  
58  
59  
60

# BMJ Open

## Factors associated with long-term prescription of benzodiazepine: a retrospective cohort study using a health insurance database in Japan

|                                 |                                                                                                                                                                                                                                                                                                                                                                                                                                                                                                                                                                                                                                                         |
|---------------------------------|---------------------------------------------------------------------------------------------------------------------------------------------------------------------------------------------------------------------------------------------------------------------------------------------------------------------------------------------------------------------------------------------------------------------------------------------------------------------------------------------------------------------------------------------------------------------------------------------------------------------------------------------------------|
| Journal:                        | <i>BMJ Open</i>                                                                                                                                                                                                                                                                                                                                                                                                                                                                                                                                                                                                                                         |
| Manuscript ID                   | bmjopen-2019-029641.R1                                                                                                                                                                                                                                                                                                                                                                                                                                                                                                                                                                                                                                  |
| Article Type:                   | Research                                                                                                                                                                                                                                                                                                                                                                                                                                                                                                                                                                                                                                                |
| Date Submitted by the Author:   | 01-Jun-2019                                                                                                                                                                                                                                                                                                                                                                                                                                                                                                                                                                                                                                             |
| Complete List of Authors:       | Takano, Ayumi; Tokyo Medical and Dental University<br>Ono, Sachiko; The University of Tokyo, Department of Biostatistics & Bioinformatics<br>Yamana, Hayato; The University of Tokyo, Department of Health Services Research<br>Matsui, Hiroki; The University of Tokyo, Department of Clinical Epidemiology and Health Economics<br>Matsumoto, Toshihiko; National Center of Neurology and Psychiatry, Department of Drug Dependence Research<br>Yasunaga, Hideo; School of Public Health, The University of Tokyo, Department of Clinical Epidemiology and Health Economics<br>Kawakami, Norito; The University of Tokyo, Department of Mental Health |
| <b>Primary Subject Heading</b>: | Mental health                                                                                                                                                                                                                                                                                                                                                                                                                                                                                                                                                                                                                                           |
| Secondary Subject Heading:      | Public health                                                                                                                                                                                                                                                                                                                                                                                                                                                                                                                                                                                                                                           |
| Keywords:                       | Benzodiazepine, Cohort study, Dependence, Long-term prescription, Risk factors                                                                                                                                                                                                                                                                                                                                                                                                                                                                                                                                                                          |
|                                 |                                                                                                                                                                                                                                                                                                                                                                                                                                                                                                                                                                                                                                                         |

SCHOLARONE™  
Manuscripts



1  
2  
3  
4  
5  
6 Factors associated with long-term prescription of benzodiazepine: a retrospective cohort  
7 study using a health insurance database in Japan  
8  
9

- 10 1. Ayumi Takano, PhD,  
11 Department of Mental Health and Psychiatric Nursing, Tokyo Medical and Dental  
12 University  
13  
14 2. Sachiko Ono, MPH,  
15 Department of Biostatistics & Bioinformatics, The University of Tokyo  
16  
17 3. Hayato Yamana, PhD,  
18 Department of Health Services Research, The University of Tokyo  
19  
20 4. Hiroki Matsui, MPH,  
21 Department of Clinical Epidemiology and Health Economics, The University of  
22 Tokyo  
23  
24 5. Toshihiko Matsumoto, PhD,  
25 Department of Drug Dependence Research, National Center of Neurology and  
26 Psychiatry  
27  
28 6. Hideo Yasunaga, PhD,  
29 Department of Clinical Epidemiology and Health Economics, The University of  
30 Tokyo  
31  
32 7. Norito Kawakami, PhD,  
33 Department of Mental Health, The University of Tokyo  
34  
35  
36  
37  
38

39 Corresponding author

40 Ayumi Takano

41 Department of Mental Health and Psychiatric Nursing, Tokyo Medical and Dental  
42 University  
43

44 1-5-45 Yushima, Bunkyo-Ku, Tokyo, 113-8510 Japan

45 TEL: +81-3-5803-5348

46 ayumi-takano@umin.ac.jp  
47  
48  
49  
50  
51

52 Word count: 2796  
53  
54

55 Key words:

56 Benzodiazepine, Cohort study, Dependence, Long-term prescription, Risk factors  
57  
58  
59  
60

1  
2  
3  
4  
5  
6 **Abstract**  
7

8  
9  
10 2 Objectives: Current clinical guidelines discourage long-term prescription of  
11  
12 3 benzodiazepines and Z-drugs (BZD), however, the practice continues to exist.

13  
14  
15 4 The aim of this study was to investigate the proportion of long-term BZD prescriptions  
16  
17  
18 5 and its risk factors.

19  
20  
21 6 Design: Retrospective cohort study using a health insurance database.

22  
23  
24 7 Setting: Japan.

25  
26  
27 8 Participants: A total 86,909 patients were identified as outpatients aged 18 to 65 who  
28  
29  
30 9 started BZD between October 1st, 2012 and April 1st, 2015. After excluding patients  
31  
32  
33 10 who underwent surgery on the day of first BZD prescription (n = 762) and patients  
34  
35  
36 11 without eight months follow-up (n = 12,103), 74,044 outpatients were analyzed.

37  
38  
39 12 Main outcome measures: We investigated the proportion of long-term prescriptions for  
40  
41  
42 13  $\geq 8$  months among new BZD users. We assessed patient demographics, diagnoses,  
43  
44  
45 14 characteristics of the initial BZD prescription, and prescribers as potential predictors of  
46  
47  
48 15 the long-term BZD prescription. Multivariable logistic regression was performed to  
49  
50  
51 16 assess the association between long-term prescription and potential predictors.

52  
53  
54 17 Results: Of the new BZD users, 6,687 (9.0%) were consecutively prescribed BZD for  $\geq$   
55  
56  
57 18 8 months. The long-term prescription was significantly associated with mood and  
58  
59  
60

1  
2  
3  
4  
5  
6 19 neurotic disorder, cancer, prescription by psychiatrists, multiple prescriptions,  
7  
8  
9 20 hypnotics, and medium half-life BZD in the initial prescription.  
10  
11  
12 21 Conclusion: Despite the recent clinical guidelines, 9% of new BZD users were given  
13  
14  
15 22 prescriptions for more than 8 months. Physicians should be aware of risk factors when  
16  
17  
18 23 prescribing BZDs for the first time.  
19  
20  
21  
22  
23

#### 24 25 **Strengths and limitations of this study**

- 26 ● A large sample of Japanese outpatients among the non-elderly adult population.
- 27 ● Analyzed new benzodiazepine users to prevent prevalent user bias.
- 28 ● A strict definition of long-term use of benzodiazepine by identifying consecutive  
29 monthly prescription data.
- 30 ● Limitations in detailed and accurate information in the health insurance database  
31 such as diagnosis and severity of psychiatric disorders.

#### 32 33 **Introduction**

34 Globally, there is increasing concern about the long-term use of benzodiazepines and  
35 Z-drugs (BZD). Although BZDs are safer than old sedative-hypnotics, the efficacy of  
36 their long-term use has not been demonstrated. Long-term use of BZD leads to

1  
2  
3  
4  
5  
6  
7  
8  
9  
10  
11  
12  
13  
14  
15  
16  
17  
18  
19  
20  
21  
22  
23  
24  
25  
26  
27  
28  
29  
30  
31  
32  
33  
34  
35  
36  
37  
38  
39  
40  
41  
42  
43  
44  
45  
46  
47  
48  
49  
50  
51  
52  
53  
54  
55  
56  
57  
58  
59  
60

37 dependence. <sup>1</sup> Patients may become dependent on BZDs to avoid withdrawal symptoms.

38 <sup>1-3</sup> Studies have shown several adverse consequences related to the long-term use of  
39 BZD, including fracture, <sup>4,5</sup> cancer, <sup>6</sup> and car accidents <sup>7</sup> in any age group.

40 An understanding about the prevalence of long-term use of BZDs and its risk  
41 factors is essential for preventing adverse consequences. However, the reported  
42 prevalence of long-term BZD use varies widely because of variability in the definition  
43 of a long-term BZD prescription, study participants, and follow-up period <sup>8,9</sup> Over half  
44 of previous studies did not provide an adequate explanation for the definitions. <sup>9</sup> Some  
45 studies used one prescription per year or per several months as the definition of a  
46 long-term BZD prescription and others included prevalent users of BZDs or only the  
47 elderly as the study population. These studies may have overestimated the proportion of  
48 long-term prescription of BZDs.

49 The reported risk factors of a long-term prescription have been also  
50 inconsistent. In a systematic review, <sup>9</sup> long-term prescription of BZDs were associated  
51 with an older age, psychiatric disorders, and polypharmacy or high-dose BZDs at the  
52 initial prescription. However, the association of several other factors with long-term use  
53 of BZDs remains inconsistent, including demographic variables (e.g., gender, income),  
54 type of BZDs (e.g., half-life, Z-drug), or characteristics of prescriber (e.g., psychiatry).

1  
2  
3  
4  
5  
6  
7 55 The inconsistencies may have been affected by variability in the definition of long-term  
8  
9 56 use of BZD. <sup>10</sup> For example, in a study where long-term prescription was defined as at  
10  
11  
12 57 least one prescription every three months, female gender was a risk factor. <sup>11</sup> However,  
13  
14  
15 58 in another study where long-term prescription was defined as BZD use lasting for 60  
16  
17  
18 59 days, male gender was a risk factor. <sup>10</sup>

20  
21 60 In this study, we followed new BZDs users who continued the drugs for  $\geq 8$   
22  
23  
24 61 consecutive months. This definition was selected based on two previous studies. <sup>9, 12</sup> In a  
25  
26  
27 62 systematic review, long-term BZD use was commonly defined as 6-12 months. <sup>9</sup> In  
28  
29  
30 63 another study, about a half of patients who used BZDs for 8 months experienced clear  
31  
32  
33 64 withdrawal symptoms. <sup>12</sup>

34  
35  
36 65 Using a large-scale health insurance database with detailed prescription  
37  
38  
39 66 information, the present study investigated the proportion of long-term BZD  
40  
41  
42 67 prescriptions among new BZD users in Japan with a retrospective cohort design. We  
43  
44  
45 68 also assessed examined factors associated with the long-term prescription.

46  
47  
48 69

## 70 **Methods**

### 71 **Data source**

72 We used a health insurance claims database provided by JMDC Inc., Tokyo, Japan.

1  
2  
3  
4  
5  
6 73 JMDC Inc. has collected claims information from occupation-based health insurance  
7  
8  
9 74 agencies for corporate employees and their dependents since 2005.<sup>13</sup> The JMDC  
10  
11  
12 75 database includes anonymous data of inpatient, outpatient, and pharmacy claims and  
13  
14  
15 76 special health checkups from about 3,000,000 individuals as of November 2014,  
16  
17  
18 77 representing about 2.5% of the Japanese population.<sup>14</sup> Each record includes age, sex,  
19  
20  
21 78 diagnoses, prescriptions, information about the medical institution, and date of the  
22  
23  
24 79 services. The diagnoses are based on International Classification of Diseases, 10th  
25  
26  
27 80 revision (ICD-10) diagnostic codes. The prescription information has the World Health  
28  
29  
30 81 Organization's Anatomical Therapeutic Chemical (WHO-ATC) classification system  
31  
32  
33 82 codes, drug name, dosage, days of supply, and mode of prescription. Date of  
34  
35  
36 83 prescriptions has been recorded since April 1st 2012. As such, we used data from April  
37  
38  
39 84 1st 2012 through December 31st 2015. The requirement for informed consent was  
40  
41  
42 85 waived because of the anonymous nature of the data. The study was approved by the  
43  
44  
45 86 Institutional Review Board of The University of Tokyo (No. 10862).

47  
48  
49 87

## 50 51 88 **Patient selection**

52  
53  
54 89 We selected outpatients aged 18 to 65 years who started at least one of the available oral  
55  
56  
57 90 BZDs between October 1st 2012 and April 1st 2015 (Supplementary Table 1). We  
58  
59  
60

1  
2  
3  
4  
5  
6  
7 91 chose only subjects who had been continuously enrolled in the JMDC database for at  
8  
9  
10 92 least six months before the first prescription of BZDs. We defined new users as those  
11  
12  
13 93 who had not used any BZDs for this six-month baseline period (Figure 1). We excluded  
14  
15  
16 94 patients who were followed up for less than 8 months after the first BZD prescription.  
17  
18  
19 95 We also excluded those who underwent surgery on the day of the first BZD  
20  
21  
22 96 prescription. Surgeries were identified with original Japanese procedure codes. When  
23  
24  
25 97 extracting BZDs, we used the WHO-ATC codes N05BA, N05CD, and N05CF.<sup>15</sup> We  
26  
27  
28 98 added seven BZDs which were not covered by the WHO-ATC codes, but were available  
29  
30  
31 99 in Japan. We excluded clobazam (N05BA09), which is categorized as an anti-epileptic  
32  
33  
34 100 drug in Japan, from this study because this drug is likely to be needed as a BZD for a  
35  
36  
37 101 long-term. Finally, 31 BZDs were included in this study.

38  
39 102 ---Figure 1---

40  
41  
42 103

#### 43 44 45 104 **Definition of long-term BZD prescription**

46  
47  
48 105 We defined long-term BZD users as those who received at least one prescription of any  
49  
50  
51 106 BZD every month for  $\geq 8$  consecutive months. This definition was based on the time of  
52  
53  
54 107 experiencing withdrawal symptoms.<sup>12</sup> The prescription of most BZDs (23/31, 74.2%)  
55  
56  
57 108 are restricted to 30 days in Japan (Supplementary Table 1) and most first-time  
58  
59  
60

1  
2  
3  
4  
5  
6 109 prescriptions are usually for a short-term.  
7  
8

9  
10 110

### 11 111 **Potential predictors of long-term BZD prescription**

12  
13  
14  
15 112 We assessed the following variables at the baseline period as potential predictors of  
16  
17  
18 113 long-term BZD use based on previous studies. Patient characteristics at the first BZD  
19  
20  
21 114 prescription included sex, age, occupational status (employed or dependent), diagnosis  
22  
23  
24 115 of cancer (ICD-10 code, C\$) during the prior 6 months, and psychiatric diagnosis (no  
25  
26  
27 116 diagnosis, mood disorders only [F3], neurotic, stress-related and somatic disorders only  
28  
29  
30 117 [F4], both mood disorder and neurotic disorder, but without other disorders [F3 and F4],  
31  
32  
33 118 and those with other psychiatric disorders [F0, 1, 5-9]. For example, if a patient had  
34  
35  
36 119 alcohol use disorder (F1) and depressive episode (F3), the person was categorized in  
37  
38  
39 120 other psychiatric disorders. Physician's specialty (psychiatry or other) at the first BZD  
40  
41  
42 121 prescription was also evaluated. Pharmacological characteristics of the first BZD  
43  
44  
45 122 prescription included multiple BZDs (1 or  $\geq 2$ ), type of BZD (hypnotics only,  
46  
47  
48 123 anxiolytics only, or both), administration instructions (as needed, regular prescription: 1  
49  
50  
51 124 week (1-7 days), regular prescription: 2 weeks (8-14 days), and regular prescription:  
52  
53  
54 125 more than 2 weeks ( $\geq 15$  days)), and half-life of BZD (short:  $< 12$  hours, medium:  
55  
56  
57 126 12-24 hours, long:  $\geq 24$  hours). Multiple BZD was derived from the number of BZD  
58  
59  
60



1  
2  
3  
4  
5  
6 127 ingredients in the first prescription. As for the variables of type of BZD, administration  
7  
8  
9 128 instruction and half-life of BZD, we selected the BZD with the longest prescription days  
10  
11  
12 129 if a patient was prescribed multiple BZDs.  
13  
14

15 130

### 18 131 **Statistical analyses**

20  
21 132 First, we calculated the proportion for long-term use of BZD and compared potential  
22  
23  
24 133 predictors of long-term prescription between patients who were prescribed BZDs for  $\geq 8$   
25  
26  
27 134 and  $< 8$  months. We used Student's t-test to compare the average of continuous  
28  
29  
30 135 variables (such as age) and chi-squared test to compare the proportion of categorical  
31  
32  
33 136 variables (such as sex). Next, a multivariable logistic regression was performed to  
34  
35  
36 137 assess the association between potential predictors and long-term prescription.  
37  
38

39 138 Additionally, we compared participant characteristics at the first BZD  
40  
41  
42 139 prescription between those who were followed up for 8 months and those who were  
43  
44  
45 140 censored from this study cohort. Moreover, we conducted sensitivity analysis by  
46  
47  
48 141 changing the definition of long-term prescription to consecutive monthly prescription  
49  
50  
51 142 for 6 months or 12 months to confirm the proportion of long-term prescriptions and risk  
52  
53  
54 143 factors for different definitions. Finally, we stratified the participants by prescription  
55  
56  
57 144 status (as needed or regular prescription) and then performed a multivariable logistic  
58  
59  
60

1  
2  
3  
4  
5  
6 145 regression.

7  
8  
9 146 The threshold for significance was  $p < 0.05$ . We used IBM SPSS version 23  
10  
11  
12 147 (IBM, Armonk, NY, USA) for all statistical analyses.

13  
14  
15 148

### 16 17 18 149 **Patient and public involvement**

19  
20  
21 150 Patients or members of the public were not involved in the design or implementation of  
22  
23  
24 151 this study. Patients and the general public will be informed of the study results via  
25  
26  
27 152 publication.

28  
29  
30 153

### 31 32 33 154 **Results**

#### 34 35 36 155 **Patient characteristics**

37  
38  
39 156 A total 86,909 patients were identified as new BZD users during the study period  
40  
41  
42 157 (Figure 2). After excluding patients without eight months follow-up ( $n = 12,103$ ), and  
43  
44  
45 158 patients who underwent surgery on the day of first BZD prescription ( $n = 762$ ), the  
46  
47  
48 159 remaining 74,044 patients were included in our analysis. At the first prescription, of  
49  
50  
51 160 74,044 patients, 58,404 (86.7%) were prescribed BZDs for 14 days or less and 73,526  
52  
53  
54 161 (99.3%) were prescribed BZDs for less than 30 days. There were 6,687 patients (9.0%)  
55  
56  
57 162 who were prescribed BZDs over a period of  $\geq 8$  consecutive months. When stratified by  
58  
59  
60

1  
2  
3  
4  
5  
6  
7 163 gender, 10.8% of males and 7.1% of females continued BZD use for  $\geq 8$  months. As for  
8  
9  
10 164 age group, the proportion of long-term use was 8.9%, 9.3%, 9.6%, 8.7%, and 7.2% for  
11  
12 165 subjects aged 18-29, 30-39, 40-49, 50-59, and 60-65, respectively. Table 1 shows  
13  
14  
15 166 patient characteristics, information about physicians, and pharmacological  
16  
17  
18 167 characteristics of the initial prescription. About half of patients were diagnosed with  
19  
20  
21 168 mood disorder, and hypnotics were more likely to be prescribed than anxiolytics.

22  
23  
24 169 ---Figure 2---

25  
26  
27 170 ---Table 1---

28  
29  
30 171 Table 1 Demographics and clinical characteristics for new users of benzodiazepines (N  
31 172 = 74,004)

|                                                    | BZD < 8 months<br>n=67357 (91.0) | BZD $\geq 8$ months<br>n=6687 (9.0) | p      |
|----------------------------------------------------|----------------------------------|-------------------------------------|--------|
| Age (mean, SD)                                     | 42.3 (11.8)                      | 41.9 (11.2)                         | 0.02   |
| Sex, male                                          | 33851 (50.3)                     | 4111 (61.5)                         | <0.001 |
| Occupational status, employed                      | 43315 (64.3)                     | 4827 (72.2)                         | <0.001 |
| Cancer                                             | 7073 (10.5)                      | 690 (10.3)                          | 0.66   |
| Medical speciality, psychiatry                     | 17986 (26.7)                     | 3845 (57.5)                         | <0.001 |
| Psychiatric diagnosis                              |                                  |                                     | <0.001 |
| None                                               | 28705 (42.6)                     | 1286 (19.2)                         |        |
| Mood disorder (F3)                                 | 9487 (14.1)                      | 2301 (34.4)                         |        |
| Neurotic, stress-related and somatic disorder (F4) | 21370 (31.7)                     | 1415 (21.2)                         |        |
| Mood and neurotic disorders (F3 and F4)            | 6537 (9.7)                       | 1489 (22.3)                         |        |
| Other disorders                                    | 1258 (1.9)                       | 196 (2.9)                           |        |
| Multiple BZDs on first prescription                | 6460 (9.6)                       | 1719 (25.7)                         | <0.001 |
| Type of BZD <sup>a</sup>                           |                                  |                                     | <0.001 |
| Hypnotic                                           | 20025 (29.7)                     | 2469 (36.9)                         |        |
| Anxiolytic                                         | 44027 (65.4)                     | 3184 (47.6)                         |        |
| Both                                               | 3305 (4.9)                       | 1034 (15.5)                         |        |

|                                                     |              |             |        |
|-----------------------------------------------------|--------------|-------------|--------|
| Administration instructions <sup>a</sup>            |              |             | <0.001 |
| As needed                                           | 17968 (26.7) | 969 (14.5)  |        |
| Regular prescription: 1 week (1-7 days)             | 20535 (30.5) | 2323 (34.7) |        |
| Regular prescription: 2 weeks (8-14 days)           | 19901 (29.5) | 2423 (36.2) |        |
| Regular prescription: more than 2 weeks (≥ 15 days) | 8953 (13.3)  | 972 (14.5)  |        |
| Half-life of BZD <sup>a</sup>                       |              |             | <0.001 |
| Short (< 12 h)                                      | 44968 (66.8) | 3924 (58.7) |        |
| Medium (12-24 h)                                    | 10567 (15.7) | 1531 (22.9) |        |
| Long (≥ 24 h)                                       | 11822 (17.6) | 1232 (18.4) |        |

173 Data presented as n (%) unless otherwise specified.

174 BZD, benzodiazepines and Z-drugs; SD, standard deviation.

175 a: Characteristics of BZD with the longest prescription days in the first prescription

176

177 A comparison of the baseline characteristics between the analyzed patients and

178 12,103 patients who were censored is presented in Supplementary Table 2. Censored

179 patients were more likely to be given prescriptions by psychiatrists. Otherwise, the

180 baseline characteristics were comparable between the groups.

181

## 182 Predictors of long-term prescription

183 Table 2 shows the results of the multivariable logistic regression. For patient

184 characteristics, comorbidity of mood and neurotic disorders had the strongest

185 association with long-term prescription compared to no psychiatric diagnosis (odds

186 ratio: OR, 3.53; 95% confidence interval: CI, 3.19-3.90;  $p < 0.001$ ). Patients with cancer

187 had a significantly higher risk of long-term BZD prescription than those without cancer

188 (OR, 1.18; 95% CI, 1.08-1.29;  $p < 0.001$ ). As for characteristics of the first BZD  
 189 prescription, prescription by psychiatry, hypnotics, regular prescription, and medium  
 190 half-life were associated with long-term prescription.

191

192 ---Table 2---

193 Table 2 Factors related to long-term benzodiazepine prescription among new users of  
 194 benzodiazepines (N = 74,044)

|                                                              | OR   | 95% CI       | p      |
|--------------------------------------------------------------|------|--------------|--------|
| Age                                                          | 1.02 | 1.01 to 1.02 | <0.001 |
| Sex, male                                                    | 1.14 | 1.06 to 1.23 | <0.001 |
| Occupational status, employed                                | 0.98 | 0.91 to 1.06 | 0.58   |
| Cancer                                                       | 1.18 | 1.08 to 1.29 | <0.001 |
| Medical specialty, psychiatry                                | 1.80 | 1.68 to 1.94 | <0.001 |
| Psychiatric diagnosis                                        |      |              |        |
| None                                                         | Ref. |              |        |
| Mood disorder (F3)                                           | 3.30 | 3.01 to 3.62 | <0.001 |
| Neurotic, stress-related and somatic disorder (F4)           | 1.49 | 1.36 to 1.62 | <0.001 |
| Mood and neurotic disorders (F3 and F4)                      | 3.53 | 3.19 to 3.90 | <0.001 |
| Other disorders                                              | 2.37 | 2.00 to 2.80 | <0.001 |
| Multiple BZDs on first prescription                          | 1.41 | 1.28 to 1.54 | <0.001 |
| Type of BZD <sup>a</sup>                                     |      |              |        |
| Hypnotic                                                     | Ref. |              |        |
| Anxiolytic                                                   | 0.61 | 0.57 to 0.66 | <0.001 |
| Both                                                         | 0.93 | 0.83 to 1.05 | 0.27   |
| Administration instructions <sup>a</sup>                     |      |              |        |
| As needed                                                    | Ref. |              |        |
| Regular prescription: 1 week (1-7 days)                      | 1.98 | 1.82 to 2.15 | <0.001 |
| Regular prescription: 2 weeks (8-14 days)                    | 1.91 | 1.76 to 2.07 | <0.001 |
| Regular prescription: more than 2 weeks ( $\geq 15$<br>days) | 1.83 | 1.67 to 2.02 | <0.001 |
| Half-life of BZD <sup>a</sup>                                |      |              |        |

|                     |                        |
|---------------------|------------------------|
| Short (< 12 h)      | Ref.                   |
| Medium (12-24 h)    | 1.08 1.01 to 1.16 0.03 |
| Long ( $\geq$ 24 h) | 0.96 0.89 to 1.04 0.32 |

195 BZD, benzodiazepines and Z-drugs; OR, odds ratio; CI, confidence interval

196 a: Characteristics of BZD with the longest prescription days in the first prescription

197

198 When changing the definition of long-term prescription, 11.8% and 6.1% of the  
 199 participants continued to be prescribed BZDs for 6 months and 12 months, respectively  
 200 (Supplementary Table 3). The risk factors for a long-term prescription were similar to  
 201 the results when the definition was long-term prescription for 8 months (Supplementary  
 202 Table 4). As for the results of the stratified analysis, risk factors of long-term  
 203 prescription among those with a regular prescription were the same as the results for all  
 204 participants (Supplementary Table 5). In patients who were prescribed BZDs as needed,  
 205 sex, medical specialty, multiple BZDs prescription, and half-life were not associated  
 206 with long-term prescription.

207

## 208 Discussion

209 Using a large health insurance claims database, we investigated the proportion of  
 210 long-term BZD prescriptions among new BZD users aged 18 to 65 years old. A total of  
 211 9.0% continued BZDs for  $\geq$  8 months. Long-term BZD prescription was significantly  
 212 associated with older age, cancer, comorbidity of mood and neurotic disorder, multiple

1  
2  
3  
4  
5  
6 213 BZD prescriptions, hypnotics, prescription by psychiatry, regular prescription, and  
7  
8  
9 214 medium half-life of BZD at the initial prescription.  
10  
11

12 215 This study showed 6.1%, 9.0%, and 11.8% of new users continued BZDs for  $\geq$   
13  
14  
15 216 6 months,  $\geq$  8 months, and  $\geq$  12 months, respectively. These figures were comparable to  
16  
17  
18 217 results in a previous study <sup>9</sup>, but relatively lower than prevalence in most previous  
19  
20  
21 218 studies. <sup>8,16-18</sup> This may be because previous studies used a prevalent user design or  
22  
23  
24 219 were conducted in an elderly population and resulted in an overestimation of long-term  
25  
26  
27 220 BZD use. In this study, prevalence of long-term prescription in a non-elderly population  
28  
29  
30 221 may be more reliable because we used a new-user design and assessed BZD use for  $\geq$  8  
31  
32  
33 222 consecutive months. As another possible reason, low prevalence may be due to the  
34  
35  
36 223 development of guidelines for BZDs. Guidelines restricting long-term BZD  
37  
38  
39 224 prescription, such as the UK National Institute for Health and Care Excellence  
40  
41  
42 225 guideline, were developed and have spread around the world since the 2000s. These  
43  
44  
45 226 guidelines may have affected physicians' prescription practice. Furthermore, the  
46  
47  
48 227 guidelines potentially affected the prescription preferences of patients because the  
49  
50  
51 228 information became available on the Internet.  
52  
53

54 229 Risk factors for long-term use, including older age, psychiatric disorders, users  
55  
56  
57 230 of hypnotics, regular prescription, multiple prescriptions, and psychiatrist-prescriber  
58  
59  
60

1  
2  
3  
4  
5  
6 231 were consistent with those in a previous study in Japan.<sup>11</sup> Patients with a more severe  
7  
8  
9 232 condition may consult psychiatrists, be diagnosed with one or more psychiatric  
10  
11  
12 233 disorders, and be prescribed a high dose of BZD for regular use. Although severe  
13  
14  
15 234 conditions may cause long-term use of BZDs, BZDs should be prescribed with caution  
16  
17  
18 235 because there is weak evidence for the efficacy of long-term BZD use and BZD is not  
19  
20  
21 236 the first-line treatment for depression and anxiety. The medium half-life of BZD was  
22  
23  
24 237 associated with long-term use in the present study. This result was consistent with that  
25  
26  
27 238 of other research using the same database.<sup>11</sup> However, other studies suggested the risk  
28  
29  
30 239 of short-acting BZD,<sup>19,20</sup> and evidence regarding the association between half-life and  
31  
32  
33 240 long-term use remains inconclusive in the literature.<sup>9</sup> Since 2000, Z-drug hypnotics  
34  
35  
36 241 have become popular, and temporal differences in population characteristics may have  
37  
38  
39 242 resulted in the inconsistent study results. Further study is required to evaluate the effect  
40  
41  
42 243 of the half-life of BZD on long-term prescription in a population with different  
43  
44  
45 244 characteristics.

46  
47  
48 245 In this study, patients with cancer at the baseline were more likely to continue  
49  
50  
51 246 BZD. Patients with cancer may use and continue BZD because of pain and  
52  
53  
54 247 psychological distress,<sup>8,10,21</sup> especially among non-elderly adults.<sup>22,23</sup> Moreover,  
55  
56  
57 248 patients with cancer likely have these symptoms during and even after cancer treatment.  
58  
59  
60



1  
2  
3  
4  
5  
6 249 It is important to manage pain and psychological distress by other measures to prevent  
7  
8  
9 250 additional adverse effects from long-term use of BZD among cancer patients.

11  
12 251 Based on our findings, it is important to carefully prescribe BZD in accordance  
13  
14  
15 252 with the recommendation to avoid long-term use, especially for patients with a dual  
16  
17  
18 253 diagnosis of mood and neurotic disorder, using hypnotics, prescribed two or more  
19  
20  
21 254 BZDs, and with cancer. Prescription guidelines of BZD such as the NICE guideline and  
22  
23  
24 255 WHO recommend using BZD for up to 30 days.<sup>24,25</sup> In Japan, the year-long prescription  
25  
26  
27 256 of BZD was disincentivized in 2018.<sup>26</sup> However, this may not be sufficient to prevent  
28  
29  
30 257 long-term BZD use because most BZD users may already be dependent on BZDs by  
31  
32  
33 258 one year. Additional measures should be taken to restrict BZD prescriptions. For  
34  
35  
36 259 example, an option may be to disincentivize prescriptions of high-dose BZD at the  
37  
38  
39 260 initial prescription or continuation of BZD for more than one month based on the  
40  
41  
42 261 patient's severity of psychiatric disorders.

43  
44  
45 262 The sensitivity analysis showed the risk factors were almost the same when  
46  
47  
48 263 using different definitions of long-term prescription ( $\geq 6$  or  $\geq 12$  months). This finding  
49  
50  
51 264 suggested the robustness of the analysis. However, the stratified analysis revealed that  
52  
53  
54 265 risk factors varied with a different prescription status (prescription as needed or regular  
55  
56  
57 266 prescription). Frequency of symptoms and physicians' manner of prescription may  
58  
59  
60

1  
2  
3  
4  
5  
6 267 influence prescription status. Further studies using detailed patient information and  
7  
8  
9 268 physicians' intention of prescription is necessary to identify risk factors of long-term  
10  
11  
12 269 prescription in specific patient groups.  
13  
14

15 270 This study had several limitations related to claims data. First, the data did not  
16  
17  
18 271 include severity of psychiatric disorders and insomnia symptoms. Although we adjusted  
19  
20  
21 272 for diagnosis using ICD-10 codes, there may be residual confounding due to patient  
22  
23  
24 273 conditions. Second, the analyzed cohort might not be representative of all included  
25  
26  
27 274 patients because censored patients were more likely to be prescribed first BZDs by  
28  
29  
30 275 psychiatrists. These patients might have had a relatively severe condition and tended to  
31  
32  
33 276 quit their job and change health insurance. Third, our definition of long-term  
34  
35  
36 277 prescription may also cause an underestimation of long-term prescription because  
37  
38  
39 278 people who received BZDs every two or three months were not counted as long-term.  
40  
41

42 279

## 45 280 **Conclusion**

46  
47  
48 281 We identified several risk factors for determining long-term prescription of  
49  
50  
51 282 BZD among new users of BZD. Although the prevalence of long-term users was  
52  
53  
54 283 relatively low, assessment of these risk factors is necessary to prevent long-term  
55  
56  
57 284 prescription of BZDs when physicians prescribe BZD at an initial visit.  
58  
59  
60

1  
2  
3  
4  
5  
6 285  
7  
8

9 286 **Author contributions**

10  
11  
12 287 AT, SO, Hayato Y, TM, Hideo Y, and NK devised the study protocol. AT, SO, Hayato  
13  
14  
15 288 Y, HM, and Hideo Y contributed to data collection and analysis and drafted the  
16  
17  
18 289 manuscript. All authors have contributed to interpretation and critically reviewed the  
19  
20  
21 290 manuscript. All authors approved the final version of the manuscript.  
22

23  
24 291 **Funding statement**

25  
26  
27 292 This research was supported by the Ministry of Health, Labour and Welfare, Japan; and  
28  
29  
30 293 The Health Care Science Institute, Japan.  
31

32  
33 294  
34

35  
36 295 **Competing interests**

37  
38  
39 296 The authors declare no conflict of interest.  
40

41  
42 297  
43  
44

45 298 **Data sharing statement**

46  
47  
48 299 No data are available.  
49

50  
51 300  
52

53  
54 301 **References**

55  
56  
57 302 1. Soyka M. Treatment of Benzodiazepine Dependence. *N Engl J Med.* 2017; **376**:  
58  
59  
60

- 1  
2  
3  
4  
5  
6 303 1147–57.  
7  
8  
9 304 2. Inada T, Inagaki A. Psychotropic dose equivalence in Japan. *Psychiatry Clin.*  
10  
11  
12 305 *Neurosci.* 2015; **69**: 440–7.  
13  
14  
15 306 3. Petursson H. The benzodiazepine withdrawal syndrome. *Addiction.* 1994; **89**:  
16  
17  
18 307 1455–9.  
19  
20  
21 308 4. Donnelly K, Bracchi R, Hewitt J, Routledge PA, Carter B. Benzodiazepines,  
22  
23  
24 309 Z-drugs and the risk of hip fracture: A systematic review and meta- analysis. *PLoS*  
25  
26  
27 310 *One.* 2017; **12**: e0174730.  
28  
29  
30 311 5. Weich S, Pearce HL, Croft P, Singh S, Crome I, Bashford J, et al. Effect of  
31  
32  
33 312 anxiolytic and hypnotic drug prescriptions on mortality hazards: Retrospective  
34  
35  
36 313 cohort study. *BMJ.* 2014; **348**: 1–12.  
37  
38  
39 314 6. Kim H-B, Myung S-K, Park YC, Park B. Use of benzodiazepine and risk of cancer:  
40  
41  
42 315 A meta-analysis of observational studies. *Int J Cancer.* 2017; **140**: 513–25.  
43  
44  
45 316 7. Elvik R. Risk of road accident associated with the use of drugs: A systematic  
46  
47  
48 317 review and meta-analysis of evidence from epidemiological studies. *Accid. Anal.*  
49  
50  
51 318 *Prev.* 2013; **60**: 254–67.  
52  
53  
54 319 8. Fang S-Y, Chen C-Y, Chang I-S, Wu EC-H, Chang C-M, Lin K-M. Predictors of  
55  
56  
57 320 the incidence and discontinuation of long-term use of benzodiazepines: A

- 1  
2  
3  
4  
5  
6 321 population-based study. *Drug Alcohol Depend.* 2009; **104**: 140–6.  
7  
8  
9 322 9. Kurko TAT, Saastamoinen LK, Tähkäpää S, Tuulio-Henriksson A, Taiminen T,  
10  
11  
12 323 Tiihonen J, et al. Long-term use of benzodiazepines: Definitions, prevalence and  
13  
14  
15 324 usage patterns – a systematic review of register-based studies. *Eur. Psychiatry.*  
16  
17  
18 325 2015; **30**: 1037–47.  
19  
20  
21 326 10. Simon GE, Vonkorff M, Barlow W, Pabiniak C, Wagner E. Predictors of Chronic  
22  
23  
24 327 Benzodiazepine Use in a Health Maintenance Organization Sample. *J Clin*  
25  
26  
27 328 *Epidemiol.* 1996; **49**: 1067–73.  
28  
29  
30 329 11. Takeshima N, Ogawa Y, Hayasaka Y, Furukawa TA. Continuation and  
31  
32  
33 330 discontinuation of benzodiazepine prescriptions: A cohort study based on a large  
34  
35  
36 331 claims database in Japan. *Psychiatry Res.* 2016; **237**: 201–7.  
37  
38  
39 332 12. Rickels K, Case WG, Downing RW, Winokur A. Long-term Diazepam Therapy  
40  
41  
42 333 and Clinical Outcome. *JAMA.* 1983 ;**250**: 767-71.  
43  
44  
45 334 13. Kimura S, Sato T, Ikeda S, Noda M, Nakayama T. Development of a Database of  
46  
47  
48 335 Health Insurance Claims: Standardization of Disease Classifications and  
49  
50  
51 336 Anonymous Record Linkage. *J. Epidemiol.* 2010; **20**: 413–9.  
52  
53  
54 337 14. JMDC Inc. [Feature of JMDC Claims Database]. [Cited 18 Nov 2018.] Available  
55  
56  
57 338 from <https://www.jmdc.co.jp/pharma/database.html> (in Japanese)  
58  
59  
60

- 1  
2  
3  
4  
5  
6  
7 339 15. WHOCC - ATC/DDD Index. [Cited 18 Nov 2018.] Available from  
8  
9 340 [https://www.whooc.no/atc\\_ddd\\_index/](https://www.whooc.no/atc_ddd_index/)  
10  
11  
12 341 16. Cunningham CM, Hanley GE, Morgan S. Patterns in the use of benzodiazepines in  
13  
14  
15 342 British Columbia: Examining the impact of increasing research and guideline  
16  
17  
18 343 cautions against long-term use. *Health Policy*. 2010; **97**:122–9.  
19  
20  
21 344 17. Isacson D. Long-term benzodiazepine use: Factors of importance and the  
22  
23  
24 345 development of individual use patterns over time—A 13-year follow-up in a  
25  
26  
27 346 Swedish community. *Soc. Sci. Med.* 1997; **44**:1871–80.  
28  
29  
30 347 18. van Hulst R, Isacson D, Bakker A, Leufkens HG. Comparing patterns of  
31  
32  
33 348 long-term benzodiazepine use between a Dutch and a Swedish community.  
34  
35  
36 349 *Pharmacoepidemiol Drug Saf.* 2003 ;**12**: 49–53.  
37  
38  
39 350 19. Hallfors DD, Saxe L. The dependence potential of short half-life benzodiazepines: a  
40  
41  
42 351 meta-analysis. *Am J Public Health*. 1993; **83**: 1300–4.  
43  
44  
45 352 20. Owen RT, Tyrer P. Benzodiazepine Dependence A Review of the Evidence. *Drug*.  
46  
47  
48 353 1983; **25** :385–98.  
49  
50  
51 354 21. Luijendijk HJ, Tiemeier H, Hofman A, Heeringa J, Stricker BHC. Determinants of  
52  
53  
54 355 chronic benzodiazepine use in the elderly: A longitudinal study. *Br J Clin*  
55  
56  
57 356 *Pharmacol.* 2008; **65**: 593–9.  
58  
59  
60

- 1  
2  
3  
4  
5  
6 357 22. Mehta RD, Roth AJ. Psychiatric considerations in the oncology setting. *CA Cancer*  
7  
8  
9 358 *J Clin.* 2015; **65**: 299–314.
- 10  
11  
12 359 23. Miovic M, Block S. Psychiatric disorders in advanced cancer. *Cancer.* 2007; **110**:  
13  
14  
15 360 1665–76.
- 16  
17  
18 361 24. NICE. Hypnotics | Guidance and guidelines |. [Cited 18 Nov 2018.] Available from  
19  
20  
21 362 <https://www.nice.org.uk/advice/ktt6/chapter/evidence-context>
- 22  
23  
24 363 25. WHO. Programme on Substance Abuse. Rational use of benzodiazepines. 1996  
25  
26  
27 364 [Cited 18 Nov 2018.] Available from  
28  
29  
30 365 [http://apps.who.int/iris/bitstream/handle/10665/65947/WHO\\_PSA\\_96.11.pdf?seque](http://apps.who.int/iris/bitstream/handle/10665/65947/WHO_PSA_96.11.pdf?sequence=1&isAllowed=y)  
31  
32  
33 366 [nce=1&isAllowed=y](http://apps.who.int/iris/bitstream/handle/10665/65947/WHO_PSA_96.11.pdf?sequence=1&isAllowed=y)
- 34  
35  
36 367 26. Ministry of Health, Labour and Welfare. [Revision of Medical Fees in 2018  
37  
38  
39 368 (medical treatment and pharmaceutical)]. [Cited 18 Nov 2018.] Available from  
40  
41  
42 369 [http://www.mhlw.go.jp/file/06-Seisakujouhou-12400000-Hokenkyoku/0000196430.p](http://www.mhlw.go.jp/file/06-Seisakujouhou-12400000-Hokenkyoku/0000196430.pdf)  
43  
44  
45 370 [df](http://www.mhlw.go.jp/file/06-Seisakujouhou-12400000-Hokenkyoku/0000196430.pdf) (in Japanese)

46  
47  
48  
49  
50  
51 372  
52  
53  
54 373 **Figure legend/caption**

55  
56  
57 374 Figure 1. Patient selection  
58  
59  
60

1  
2  
3  
4  
5  
6 375 BZD: benzodiazepines and Z-drug  
7  
8

9 376  
10  
11

12 377 Figure 2. Participant flow diagram  
13  
14

15 378 BZD: benzodiazepines and Z-drug  
16  
17

18 379  
19  
20

21 380  
22  
23

24 381  
25  
26  
27  
28  
29  
30  
31  
32  
33  
34  
35  
36  
37  
38  
39  
40  
41  
42  
43  
44  
45  
46  
47  
48  
49  
50  
51  
52  
53  
54  
55  
56  
57  
58  
59  
60

For peer review only



1  
2  
3  
4  
5  
6  
7  
8  
9  
10  
11  
12  
13  
14  
15  
16  
17  
18  
19  
20  
21  
22  
23  
24  
25  
26  
27  
28  
29  
30  
31  
32  
33  
34  
35  
36  
37  
38  
39  
40  
41  
42  
43  
44  
45  
46  
47  
48  
49  
50  
51  
52  
53  
54  
55  
56  
57  
58  
59  
60

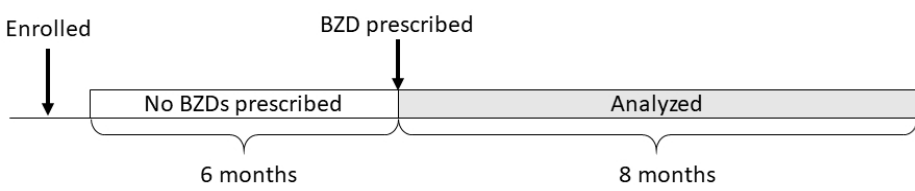

Figure 1  
254x190mm (96 x 96 DPI)

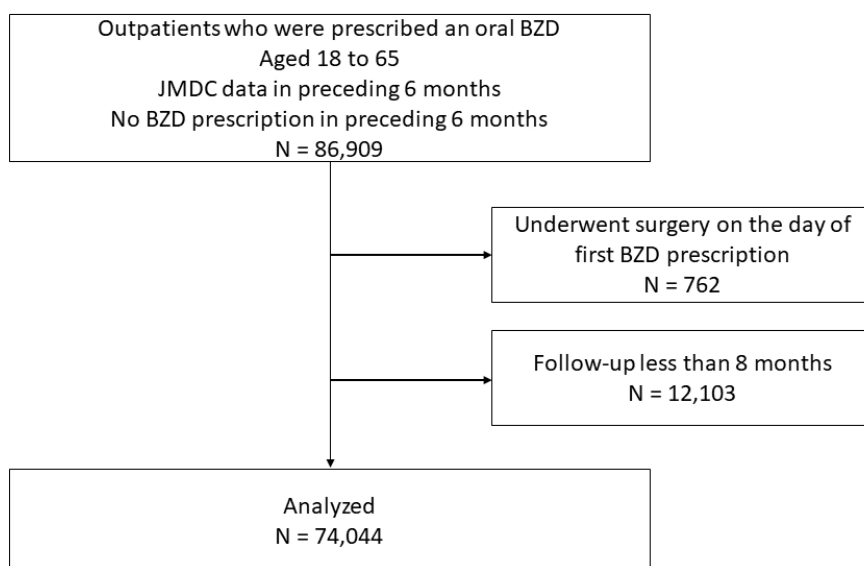

Figure 2

254x190mm (96 x 96 DPI)

## Supplementary Table 1

List of benzodiazepine and benzodiazepine-related drugs included in this study

|                                                   | ATC code    | Generic name          | Maximum number of prescription days |
|---------------------------------------------------|-------------|-----------------------|-------------------------------------|
| benzodiazepine-derivative anxiolytics             |             |                       |                                     |
| 1                                                 | N05BA01     | diazepam              | 90                                  |
| 2                                                 | N05BA02     | chlordiazepoxide      | 30                                  |
| 3                                                 | N05BA03     | medazepam             | 30                                  |
| 4                                                 | N05BA05     | potassium clorazepate | 14                                  |
| 5                                                 | N05BA06     | lorazepam             | 30                                  |
| 6                                                 | N05BA08     | bromazepam            | 30                                  |
| 7                                                 | N05BA12     | alprazolam            | 30                                  |
| 8                                                 | N05BA17     | fludiazepam           | 30                                  |
| 9                                                 | N05BA18     | ethyl loflazepate     | 30                                  |
| 10                                                | N05BA19     | etizolam              | 30                                  |
| 11                                                | N05BA21     | clotiazepam           | 30                                  |
| 12                                                | N05BA22     | cloxazolam            | 30                                  |
| 13                                                | N05BA23     | tofisopam             | -                                   |
| benzodiazepine-derivative hypnotics and sedatives |             |                       |                                     |
| 14                                                | N05CD01     | flurazepam            | 30                                  |
| 15                                                | N05CD02     | nitrazepam            | 90                                  |
| 16                                                | N05CD03     | flunitrazepam         | 30                                  |
| 17                                                | N05CD04     | estazolam             | 30                                  |
| 18                                                | N05CD05     | triazolam             | 30                                  |
| 19                                                | N05CD06     | lormetazepam          | 30                                  |
| 20                                                | N05CD09     | brotizolam            | 30                                  |
| 21                                                | N05CD10     | quazepam              | 30                                  |
| Z-drugs                                           |             |                       |                                     |
| 22                                                | N05CF01     | zopiclone             | 30                                  |
| 23                                                | N05CF02     | zolpidem              | 30                                  |
| 24                                                | N05CF04     | eszopiclone           | -                                   |
| Other (not covered by the WHO-ATC code)           |             |                       |                                     |
| 25                                                | anxiolytics | flutazolam            | -                                   |
| 26                                                | anxiolytics | flutoprazepam         | -                                   |
| 27                                                | anxiolytics | mexazolam             | -                                   |
| 28                                                | anxiolytics | oxazolam              | 30                                  |
| 29                                                | hypnotics   | nimetazepam           | 30                                  |
| 30                                                | hypnotics   | haloxazolam           | 30                                  |
| 31                                                | hypnotics   | rilmazafone           | -                                   |

WHO-ATC: World Health Organization Anatomical Therapeutic Chemical

Supplementary Table 2

Comparison of the characteristics between those who were followed up for 8 months and those who were censored from this study cohort (N=86147)

|                                                           | Censored<br>n=12103 (14.0) | Followed up<br>for 8 months<br>n=74044 (86.0) | Standardized<br>difference |
|-----------------------------------------------------------|----------------------------|-----------------------------------------------|----------------------------|
| Age (mean, SD)                                            | 41.0 (13.1)                | 42.2 (11.8)                                   | -0.096                     |
| Sex, male                                                 | 5740 (47.4)                | 37962 (51.3)                                  | -0.078                     |
| Occupational status, employed                             | 8101 (66.9)                | 48142 (65.0)                                  | 0.040                      |
| Cancer                                                    | 1365 (11.3)                | 7763 (10.5)                                   | 0.026                      |
| Medical specialty, psychiatry                             | 4277 (35.3)                | 21831 (29.5)                                  | 0.124                      |
| Psychiatric diagnosis                                     |                            |                                               |                            |
| None                                                      | 4306 (35.6)                | 29991 (40.5)                                  | -0.101                     |
| Mood disorder (F3)                                        | 2196 (18.1)                | 11788 (15.9)                                  | 0.059                      |
| Neurotic, stress-related and somatic disorder (F4)        | 3747 (31.0)                | 22785 (30.8)                                  | 0.004                      |
| Mood and neurotic disorders (F3 and F4)                   | 1582 (13.1)                | 8026 (10.8)                                   | 0.071                      |
| Other disorders                                           | 272 (2.2)                  | 1454 (2.0)                                    | 0.014                      |
| Multiple BZDs on first prescription                       | 1515 (12.5)                | 8179 (11.0)                                   | 0.047                      |
| Type of BZD <sup>a</sup>                                  |                            |                                               |                            |
| Hypnotic                                                  | 3918 (32.4)                | 22494 (30.4)                                  | 0.043                      |
| Anxiolytic                                                | 7353 (60.8)                | 47211 (63.8)                                  | -0.062                     |
| Both                                                      | 832 (6.9)                  | 4339 (5.9)                                    | 0.041                      |
| Administration instructions <sup>a</sup>                  |                            |                                               |                            |
| As needed                                                 | 2992 (24.7)                | 18937 (25.6)                                  | -0.021                     |
| Regular prescription: 1 week (1-7 days)                   | 3815 (31.5)                | 22858 (30.9)                                  | 0.013                      |
| Regular prescription: 2 weeks (8-14 days)                 | 3808 (31.5)                | 22324 (30.1)                                  | 0.030                      |
| Regular prescription: more than 2 weeks ( $\geq$ 15 days) | 1488 (12.3)                | 9925 (13.4)                                   | -0.033                     |
| Half-life of BZD <sup>a</sup>                             |                            |                                               |                            |
| Short (< 12 h)                                            | 7858 (64.9)                | 48892 (66.0)                                  | -0.023                     |
| Medium (12-24 h)                                          | 2236 (18.5)                | 12098 (16.3)                                  | 0.058                      |
| Long ( $\geq$ 24 h)                                       | 2009 (16.6)                | 13054 (17.6)                                  | -0.027                     |

Data presented as n (%) unless otherwise specified.

BZD, benzodiazepines and Z-drugs; SD, standard deviation.

a: Characteristics of BZD with the longest prescription days in the first prescription

Supplementary Table 3

Demographics and clinical characteristics of new users of BZD when using different definitions for long-term prescription

|                                                     | BZD < 6 months<br>(N=81409) | BZD ≥ 6 months |        | BZD < 12 months<br>(N=61857) | BZD ≥ 12 months |        |
|-----------------------------------------------------|-----------------------------|----------------|--------|------------------------------|-----------------|--------|
|                                                     | 71770 (88.2)                | 9639 (11.8)    | p      | 58061 (93.9)                 | 3796 (6.1)      | p      |
| Age (mean, SD)                                      | 42.2 (11.9)                 | 41.9 (11.4)    | 0.01   | 42.3 (11.7)                  | 42.2 (11.0)     | 0.83   |
| Sex, male                                           | 35731 (49.8)                | 5821 (60.4)    | <0.001 | 29468 (50.8)                 | 2338 (61.6)     | <0.001 |
| Occupational status, employed                       | 46011 (64.1)                | 6902 (71.6)    | <0.001 | 37458 (64.5)                 | 2735 (72.0)     | <0.001 |
| Cancer                                              | 7481 (10.4)                 | 1079 (11.2)    | 0.02   | 6075 (10.5)                  | 379 (10.0)      | 0.36   |
| Medical specialty, psychiatry                       | 18922 (26.4)                | 5401 (56.0)    | <0.001 | 15645 (26.9)                 | 2206 (58.1)     | <0.001 |
| Psychiatric diagnosis                               |                             |                | <0.001 |                              |                 | <0.001 |
| None                                                | 30772 (42.9)                | 1958 (20.3)    |        | 24701 (42.5)                 | 709 (18.7)      |        |
| Mood disorder (F3)                                  | 9839 (13.7)                 | 3211 (33.3)    |        | 8385 (14.4)                  | 1338 (35.2)     |        |
| Neurotic, stress-related and somatic disorder (F4)  | 22978 (32.0)                | 2119 (22.0)    |        | 18203 (31.4)                 | 777 (20.5)      |        |
| Mood and neurotic disorders (F3 and F4)             | 6840 (9.5)                  | 2093 (21.7)    |        | 5711 (9.8)                   | 857 (22.6)      |        |
| Other disorders                                     | 1341 (1.9)                  | 258 (2.7)      |        | 1061 (1.8)                   | 115 (3.0)       |        |
| Multiple BZDs on first prescription                 | 6650 (9.3)                  | 2339 (24.3)    | <0.001 | 5798 (10.0)                  | 1023 (26.9)     | <0.001 |
| Type of BZD <sup>a</sup>                            |                             |                | <0.001 |                              |                 | <0.001 |
| Hypnotic                                            | 21290 (29.7)                | 3550 (36.8)    |        | 17411 (30.0)                 | 1428 (37.6)     |        |
| Anxiolytic                                          | 47097 (65.6)                | 4707 (48.8)    |        | 37659 (64.9)                 | 1754 (46.2)     |        |
| Both                                                | 3383 (4.7)                  | 1382 (14.3)    |        | 2991 (5.2)                   | 614 (16.2)      |        |
| Administration instructions <sup>a</sup>            |                             |                | <0.001 |                              |                 | <0.001 |
| As needed                                           | 19365 (27.0)                | 1481 (15.4)    |        | 15277 (26.3)                 | 543 (14.3)      |        |
| Regular prescription: 1 week (1-7 days)             | 21902 (30.5)                | 3296 (34.2)    |        | 17699 (30.5)                 | 1347 (35.5)     |        |
| Regular prescription: 2 weeks (8-14 days)           | 21089 (29.4)                | 3493 (36.2)    |        | 17285 (29.8)                 | 1360 (35.8)     |        |
| Regular prescription: more than 2 weeks (≥ 15 days) | 9414 (13.1)                 | 1369 (14.2)    |        | 7800 (13.4)                  | 546 (14.4)      |        |
| Half-life of BZD <sup>a</sup>                       |                             |                | <0.001 |                              |                 | <0.001 |
| Short (< 12 h)                                      | 48097 (67.0)                | 5655 (58.7)    |        | 38801 (66.8)                 | 2207 (58.1)     |        |
| Medium (12-24 h)                                    | 11210 (15.6)                | 2191 (22.7)    |        | 9100 (15.7)                  | 882 (23.2)      |        |
| Long (≥ 24 h)                                       | 12463 (17.4)                | 1793 (18.6)    |        | 10160 (17.5)                 | 707 (18.6)      |        |

Data presented as n (%) unless otherwise specified.

BZD, benzodiazepines and Z-drugs; SD, standard deviation.

a: Characteristics of BZD with the longest prescription days in the first prescription

Supplementary Table 4

Factors related to long-term BZD prescription among new BZD users when using different definitions for long-term prescription

|                                                           | long-term: $\geq 6$ months<br>(N=81409) |              |        | long-term: $\geq 12$ months<br>(N=61857) |               |        |
|-----------------------------------------------------------|-----------------------------------------|--------------|--------|------------------------------------------|---------------|--------|
|                                                           | OR                                      | 95% CI       | p      | OR                                       | 95% CI        | p      |
| Age                                                       | 1.01                                    | 1.01 to 1.02 | <0.001 | 1.02                                     | 1.02 to 1.02  | <0.001 |
| Sex, male                                                 | 1.13                                    | 1.06 to 1.20 | <0.001 | 1.11                                     | 1.01 to 1.22  | 0.03   |
| Occupational status, employed                             | 0.98                                    | 0.92 to 1.05 | 0.64   | 0.97                                     | 0.88 to 1.08  | 0.58   |
| Cancer                                                    | 1.32                                    | 1.23 to 1.42 | <0.001 | 1.11                                     | 0.99 to 1.25  | 0.07   |
| Medical specialty, psychiatry                             | 1.78                                    | 1.68 to 1.89 | <0.001 | 1.77                                     | 1.61 to 1.94  | <0.001 |
| Psychiatric diagnosis                                     |                                         |              |        |                                          |               |        |
| None                                                      | Ref.                                    |              |        | Ref.                                     |               |        |
| Mood disorder (F3)                                        | 3.20                                    | 2.96 to 3.46 | <0.001 | 3.44                                     | 3.04 to 3.88  | <0.001 |
| Neurotic, stress-related and somatic disorder (F4)        | 1.46                                    | 1.36 to 1.57 | <0.001 | 1.53                                     | 1.36 to 1.72  | <0.001 |
| Mood and neurotic disorders (F3 and F4)                   | 3.37                                    | 3.10 to 3.67 | <0.001 | 3.71                                     | 3.25 to 4.23  | <0.001 |
| Other disorders                                           | 2.06                                    | 1.77 to 2.39 | <0.001 | 2.60                                     | 2.09 to 3.24  | <0.001 |
| Multiple BZDs on first prescription                       | 1.40                                    | 1.29 to 1.52 | <0.001 | 1.43                                     | 1.27 to 1.61  | <0.001 |
| Type of BZD <sup>a</sup>                                  |                                         |              |        |                                          |               |        |
| Hypnotic                                                  | Ref.                                    |              |        | Ref.                                     |               |        |
| Anxiolytic                                                | 0.61                                    | 0.58 to 0.64 | <0.001 | 0.59                                     | 0.54 to 0.64  | <0.001 |
| Both                                                      | 0.89                                    | 0.80 to 0.99 | 0.04   | 0.90                                     | 0.77 to 1.04  | 0.14   |
| Administration instructions <sup>a</sup>                  |                                         |              |        |                                          |               |        |
| As needed                                                 | Ref.                                    |              |        | Ref.                                     |               |        |
| Regular prescription: 1 week (1-7 days)                   | 1.87                                    | 1.75 to 2.00 | <0.001 | 1.98                                     | 1.78 to 2.20  | <0.001 |
| Regular prescription: 2 weeks (8-14 days)                 | 1.86                                    | 1.74 to 1.99 | <0.001 | 1.83                                     | 1.65 to 2.04  | <0.001 |
| Regular prescription: more than 2 weeks ( $\geq 15$ days) | 1.75                                    | 1.61 to 1.90 | <0.001 | 1.76                                     | 1.55 to 1.99  | <0.001 |
| Half-life of BZD <sup>a</sup>                             |                                         |              |        |                                          |               |        |
| Short (< 12 h)                                            | Ref.                                    |              |        | Ref.                                     |               |        |
| Medium (12-24 h)                                          | 1.12                                    | 1.05 to 1.19 | <0.001 | 1.11                                     | 1.01 to 1.22  | 0.03   |
| Long ( $\geq 24$ h)                                       | 1.02                                    | 0.95 to 1.09 | 0.62   | 0.997                                    | 0.900 to 1.10 | 0.95   |

BZD, benzodiazepines and Z-drugs; OR, odds ratio; CI, confidence interval

<sup>a</sup>: Characteristics of BZD with the longest prescription days in the first prescription

Supplementary Table 5

Factors related to long-term BZD prescription ( $\geq 8$  months) among the new BZD users with as-needed prescription or regular prescription

|                                                    | As needed (n=18937) |              |        | Regular (n=55107) |              |        |
|----------------------------------------------------|---------------------|--------------|--------|-------------------|--------------|--------|
|                                                    | OR                  | 95% CI       | p      | OR                | 95% CI       | p      |
| Age                                                | 1.01                | 1.00 to 1.02 | <0.01  | 1.02              | 1.01 to 1.02 | <0.001 |
| Sex, male                                          | 1.13                | 0.95 to 1.35 | 0.17   | 1.14              | 1.05 to 1.23 | <0.01  |
| Occupational status, employed                      | 0.97                | 0.81 to 1.17 | 0.75   | 0.98              | 0.90 to 1.06 | 0.61   |
| Cancer                                             | 1.41                | 1.17 to 1.71 | <0.001 | 1.11              | 1.00 to 1.22 | 0.04   |
| Medical specialty, psychiatry                      | 1.18                | 0.98 to 1.42 | 0.08   | 1.96              | 1.81 to 2.11 | <0.001 |
| Psychiatric diagnosis                              |                     |              |        |                   |              |        |
| None                                               | Ref.                |              |        |                   |              |        |
| Mood disorder (F3)                                 | 3.00                | 2.36 to 3.82 | <0.001 | 3.41              | 3.08 to 3.77 | <0.001 |
| Neurotic, stress-related and somatic disorder (F4) | 1.53                | 1.24 to 1.89 | <0.001 | 1.52              | 1.38 to 1.67 | <0.001 |
| Mood and neurotic disorders (F3 and F4)            | 4.16                | 3.24 to 5.34 | <0.001 | 3.53              | 3.16 to 3.95 | <0.001 |
| Other disorders                                    | 2.13                | 1.44 to 3.15 | <0.001 | 2.48              | 2.05 to 2.99 | <0.001 |
| Multiple BZDs on first prescriptions <sup>a</sup>  | 1.45                | 0.79 to 2.65 | 0.23   | 1.37              | 1.25 to 1.51 | <0.001 |
| Type of BZD <sup>a</sup>                           |                     |              |        |                   |              |        |
| Hypnotic                                           | Ref.                |              |        |                   |              |        |
| Anxiolytic                                         | 0.44                | 0.37 to 0.52 | <0.001 | 0.67              | 0.62 to 0.72 | <0.001 |
| Both                                               | 0.70                | 0.36 to 1.39 | 0.31   | 0.99              | 0.88 to 1.12 | 0.90   |
| Half-life of BZD <sup>a</sup>                      |                     |              |        |                   |              |        |
| Short (< 12 h)                                     | Ref.                |              |        |                   |              |        |
| Medium (12-24 h)                                   | 1.11                | 0.92 to 1.33 | 0.28   | 1.10              | 1.02 to 1.19 | 0.02   |
| Long ( $\geq 24$ h)                                | 0.80                | 0.60 to 1.07 | 0.13   | 0.95              | 0.87 to 1.03 | 0.22   |

BZD, benzodiazepines and Z-drugs; OR, odds ratio; CI, confidence interval

a: Characteristics of BZD with the longest prescription days in the first prescription

# Reporting checklist for cohort study.

Based on the STROBE cohort guidelines.

## Instructions to authors

Complete this checklist by entering the page numbers from your manuscript where readers will find each of the items listed below.

Your article may not currently address all the items on the checklist. Please modify your text to include the missing information. If you are certain that an item does not apply, please write "n/a" and provide a short explanation.

Upload your completed checklist as an extra file when you submit to a journal.

In your methods section, say that you used the STROBE cohort reporting guidelines, and cite them as:

von Elm E, Altman DG, Egger M, Pocock SJ, Gøtzsche PC, Vandenbroucke JP. The Strengthening the Reporting of Observational Studies in Epidemiology (STROBE) Statement: guidelines for reporting observational studies.

|                        |     | Reporting Item                                                                                                                  | Page Number |
|------------------------|-----|---------------------------------------------------------------------------------------------------------------------------------|-------------|
| Title                  | #1a | Indicate the study's design with a commonly used term in the title or the abstract                                              | 1           |
| Abstract               | #1b | Provide in the abstract an informative and balanced summary of what was done and what was found                                 | 2-3         |
| Background / rationale | #2  | Explain the scientific background and rationale for the investigation being reported                                            | 3-5         |
| Objectives             | #3  | State specific objectives, including any prespecified hypotheses                                                                | 5           |
| Study design           | #4  | Present key elements of study design early in the paper                                                                         | 5           |
| Setting                | #5  | Describe the setting, locations, and relevant dates, including periods of recruitment, exposure, follow-up, and data collection | 5-8         |
| Eligibility criteria   | #6a | Give the eligibility criteria, and the sources and methods of selection of participants. Describe methods of follow-up.         | 5-8, Fig 1  |



|    |                  |      |                                                                   |        |
|----|------------------|------|-------------------------------------------------------------------|--------|
| 1  |                  | #6b  | For matched studies, give matching criteria and number of         | NA     |
| 2  |                  |      | exposed and unexposed                                             |        |
| 3  |                  |      |                                                                   |        |
| 4  |                  |      |                                                                   |        |
| 5  | Variables        | #7   | Clearly define all outcomes, exposures, predictors, potential     | 7-9    |
| 6  |                  |      | confounders, and effect modifiers. Give diagnostic criteria, if   |        |
| 7  |                  |      | applicable                                                        |        |
| 8  |                  |      |                                                                   |        |
| 9  |                  |      |                                                                   |        |
| 10 | Data sources /   | #8   | For each variable of interest give sources of data and details    | 5-9    |
| 11 | measurement      |      | of methods of assessment (measurement). Describe                  |        |
| 12 |                  |      | comparability of assessment methods if there is more than one     |        |
| 13 |                  |      | group. Give information separately for for exposed and            |        |
| 14 |                  |      | unexposed groups if applicable.                                   |        |
| 15 |                  |      |                                                                   |        |
| 16 |                  |      |                                                                   |        |
| 17 |                  |      |                                                                   |        |
| 18 | Bias             | #9   | Describe any efforts to address potential sources of bias         | 6-7    |
| 19 |                  |      |                                                                   |        |
| 20 |                  |      |                                                                   |        |
| 21 | Study size       | #10  | Explain how the study size was arrived at                         | 6-7    |
| 22 |                  |      |                                                                   |        |
| 23 | Quantitative     | #11  | Explain how quantitative variables were handled in the            | 8-9    |
| 24 | variables        |      | analyses. If applicable, describe which groupings were            |        |
| 25 |                  |      | chosen, and why                                                   |        |
| 26 |                  |      |                                                                   |        |
| 27 |                  |      |                                                                   |        |
| 28 | Statistical      | #12a | Describe all statistical methods, including those used to control | 9-10   |
| 29 | methods          |      | for confounding                                                   |        |
| 30 |                  |      |                                                                   |        |
| 31 |                  |      |                                                                   |        |
| 32 |                  | #12b | Describe any methods used to examine subgroups and                | 9-10   |
| 33 |                  |      | interactions                                                      |        |
| 34 |                  |      |                                                                   |        |
| 35 |                  |      |                                                                   |        |
| 36 |                  | #12c | Explain how missing data were addressed                           | NA     |
| 37 |                  |      |                                                                   |        |
| 38 |                  | #12d | If applicable, explain how loss to follow-up was addressed        | 9      |
| 39 |                  |      |                                                                   |        |
| 40 |                  |      |                                                                   |        |
| 41 |                  | #12e | Describe any sensitivity analyses                                 | 9      |
| 42 |                  |      |                                                                   |        |
| 43 | Participants     | #13a | Report numbers of individuals at each stage of study—eg           | 10     |
| 44 |                  |      | numbers potentially eligible, examined for eligibility, confirmed |        |
| 45 |                  |      | eligible, included in the study, completing follow-up, and        |        |
| 46 |                  |      | analysed. Give information separately for for exposed and         |        |
| 47 |                  |      | unexposed groups if applicable.                                   |        |
| 48 |                  |      |                                                                   |        |
| 49 |                  |      |                                                                   |        |
| 50 |                  |      |                                                                   |        |
| 51 |                  | #13b | Give reasons for non-participation at each stage                  | 10     |
| 52 |                  |      |                                                                   |        |
| 53 |                  |      |                                                                   |        |
| 54 |                  | #13c | Consider use of a flow diagram                                    | Fig 2  |
| 55 |                  |      |                                                                   |        |
| 56 | Descriptive data | #14a | Give characteristics of study participants (eg demographic,       | 10-11  |
| 57 |                  |      | clinical, social) and information on exposures and potential      | Table1 |
| 58 |                  |      |                                                                   |        |
| 59 |                  |      |                                                                   |        |
| 60 |                  |      |                                                                   |        |

|    |                  |                                                                        |         |
|----|------------------|------------------------------------------------------------------------|---------|
| 1  |                  | confounders. Give information separately for exposed and               |         |
| 2  |                  | unexposed groups if applicable.                                        |         |
| 3  |                  |                                                                        |         |
| 4  |                  | #14b Indicate number of participants with missing data for each        | NA      |
| 5  |                  | variable of interest                                                   |         |
| 6  |                  |                                                                        |         |
| 7  |                  | #14c Summarise follow-up time (eg, average and total amount)           | 10, 14  |
| 8  |                  |                                                                        |         |
| 9  |                  |                                                                        |         |
| 10 | Outcome data     | #15 Report numbers of outcome events or summary measures               | 10-11,  |
| 11 |                  | over time. Give information separately for exposed and                 | Table 1 |
| 12 |                  | unexposed groups if applicable.                                        |         |
| 13 |                  |                                                                        |         |
| 14 |                  |                                                                        |         |
| 15 | Main results     | #16a Give unadjusted estimates and, if applicable, confounder-         | 12-13,  |
| 16 |                  | adjusted estimates and their precision (eg, 95% confidence             | Table 2 |
| 17 |                  | interval). Make clear which confounders were adjusted for and          |         |
| 18 |                  | why they were included                                                 |         |
| 19 |                  |                                                                        |         |
| 20 |                  |                                                                        |         |
| 21 |                  |                                                                        |         |
| 22 |                  | #16b Report category boundaries when continuous variables were         | 8-9     |
| 23 |                  | categorized                                                            |         |
| 24 |                  |                                                                        |         |
| 25 |                  |                                                                        |         |
| 26 |                  | #16c If relevant, consider translating estimates of relative risk into | NA      |
| 27 |                  | absolute risk for a meaningful time period                             |         |
| 28 |                  |                                                                        |         |
| 29 |                  |                                                                        |         |
| 30 | Other analyses   | #17 Report other analyses done—e.g., analyses of subgroups and         | 12, 14  |
| 31 |                  | interactions, and sensitivity analyses                                 |         |
| 32 |                  |                                                                        |         |
| 33 |                  |                                                                        |         |
| 34 | Key results      | #18 Summarise key results with reference to study objectives           | 14-15   |
| 35 |                  |                                                                        |         |
| 36 | Limitations      | #19 Discuss limitations of the study, taking into account sources of   | 18      |
| 37 |                  | potential bias or imprecision. Discuss both direction and              |         |
| 38 |                  | magnitude of any potential bias.                                       |         |
| 39 |                  |                                                                        |         |
| 40 |                  |                                                                        |         |
| 41 | Interpretation   | #20 Give a cautious overall interpretation considering objectives,     | 14-19   |
| 42 |                  | limitations, multiplicity of analyses, results from similar studies,   |         |
| 43 |                  | and other relevant evidence.                                           |         |
| 44 |                  |                                                                        |         |
| 45 |                  |                                                                        |         |
| 46 | Generalisability | #21 Discuss the generalisability (external validity) of the study      | 18      |
| 47 |                  | results                                                                |         |
| 48 |                  |                                                                        |         |
| 49 |                  |                                                                        |         |
| 50 | Funding          | #22 Give the source of funding and the role of the funders for the     | 19      |
| 51 |                  | present study and, if applicable, for the original study on which      |         |
| 52 |                  | the present article is based                                           |         |
| 53 |                  |                                                                        |         |
| 54 |                  |                                                                        |         |
| 55 |                  |                                                                        |         |

## Author notes

1 The STROBE checklist is distributed under the terms of the Creative Commons Attribution License  
2 CC-BY. This checklist was completed on 03. February 2019 using <https://www.goodreports.org/>, a  
3 tool made by the [EQUATOR Network](#) in collaboration with [Penelope.ai](#)  
4  
5  
6  
7  
8  
9  
10  
11  
12  
13  
14  
15  
16  
17  
18  
19  
20  
21  
22  
23  
24  
25  
26  
27  
28  
29  
30  
31  
32  
33  
34  
35  
36  
37  
38  
39  
40  
41  
42  
43  
44  
45  
46  
47  
48  
49  
50  
51  
52  
53  
54  
55  
56  
57  
58  
59  
60
