# Supplementary material for: Factors associated with long-term prescription of benzodiazepine: a retrospective cohort study using a health insurance database in Japan
Source: PubMed Central journal article supplement — BMJ Open. 2019 Jul 26;9(7):e029641. doi: 10.1136/bmjopen-2019-029641 (PMC6661576; doi:10.1136/bmjopen-2019-029641), 2019-07-26
Supplement: bmjopen-2019-029641supp001.pdf [file bmjopen-2019-029641supp001.pdf]

Supplementary Table 1

List of benzodiazepine and benzodiazepine-related drugs included in this study

|                                                   | ATC code    | Generic name          | Maximum number of prescription days |
|---------------------------------------------------|-------------|-----------------------|-------------------------------------|
| benzodiazepine-derivative anxiolytics             |             |                       |                                     |
| 1                                                 | N05BA01     | diazepam              | 90                                  |
| 2                                                 | N05BA02     | chlordiazepoxide      | 30                                  |
| 3                                                 | N05BA03     | medazepam             | 30                                  |
| 4                                                 | N05BA05     | potassium clorazepate | 14                                  |
| 5                                                 | N05BA06     | lorazepam             | 30                                  |
| 6                                                 | N05BA08     | bromazepam            | 30                                  |
| 7                                                 | N05BA12     | alprazolam            | 30                                  |
| 8                                                 | N05BA17     | fludiazepam           | 30                                  |
| 9                                                 | N05BA18     | ethyl loflazepate     | 30                                  |
| 10                                                | N05BA19     | etizolam              | 30                                  |
| 11                                                | N05BA21     | clotiazepam           | 30                                  |
| 12                                                | N05BA22     | cloxazolam            | 30                                  |
| 13                                                | N05BA23     | tofisopam             | -                                   |
| benzodiazepine-derivative hypnotics and sedatives |             |                       |                                     |
| 14                                                | N05CD01     | flurazepam            | 30                                  |
| 15                                                | N05CD02     | nitrazepam            | 90                                  |
| 16                                                | N05CD03     | flunitrazepam         | 30                                  |
| 17                                                | N05CD04     | estazolam             | 30                                  |
| 18                                                | N05CD05     | triazolam             | 30                                  |
| 19                                                | N05CD06     | lormetazepam          | 30                                  |
| 20                                                | N05CD09     | brotizolam            | 30                                  |
| 21                                                | N05CD10     | quazepam              | 30                                  |
| Z-drugs                                           |             |                       |                                     |
| 22                                                | N05CF01     | zopiclone             | 30                                  |
| 23                                                | N05CF02     | zolpidem              | 30                                  |
| 24                                                | N05CF04     | eszopiclone           | -                                   |
| Other (not covered by the WHO-ATC code)           |             |                       |                                     |
| 25                                                | anxiolytics | flutazolam            | -                                   |
| 26                                                | anxiolytics | flutoprazepam         | -                                   |
| 27                                                | anxiolytics | mexazolam             | -                                   |
| 28                                                | anxiolytics | oxazolam              | 30                                  |
| 29                                                | hypnotics   | nimetazepam           | 30                                  |
| 30                                                | hypnotics   | haloxazolam           | 30                                  |
| 31                                                | hypnotics   | rilmazafone           | -                                   |

WHO-ATC: World Health Organization Anatomical Therapeutic Chemical
