# Supplementary material for: Factors associated with long-term prescription of benzodiazepine: a retrospective cohort study using a health insurance database in Japan
Source: PubMed Central journal article supplement — BMJ Open. 2019 Jul 26;9(7):e029641. doi: 10.1136/bmjopen-2019-029641 (PMC6661576; doi:10.1136/bmjopen-2019-029641), 2019-07-26
Supplement: bmjopen-2019-029641supp002.pdf [file bmjopen-2019-029641supp002.pdf]

Supplementary Table 2

Comparison of the characteristics between those who were followed up for 8 months and those who were censored from this study cohort (N=86147)

|                                                           | Censored<br>n=12103 (14.0) | Followed up<br>for 8 months<br>n=74044 (86.0) | Standardized<br>difference |
|-----------------------------------------------------------|----------------------------|-----------------------------------------------|----------------------------|
| Age (mean, SD)                                            | 41.0 (13.1)                | 42.2 (11.8)                                   | -0.096                     |
| Sex, male                                                 | 5740 (47.4)                | 37962 (51.3)                                  | -0.078                     |
| Occupational status, employed                             | 8101 (66.9)                | 48142 (65.0)                                  | 0.040                      |
| Cancer                                                    | 1365 (11.3)                | 7763 (10.5)                                   | 0.026                      |
| Medical specialty, psychiatry                             | 4277 (35.3)                | 21831 (29.5)                                  | 0.124                      |
| Psychiatric diagnosis                                     |                            |                                               |                            |
| None                                                      | 4306 (35.6)                | 29991 (40.5)                                  | -0.101                     |
| Mood disorder (F3)                                        | 2196 (18.1)                | 11788 (15.9)                                  | 0.059                      |
| Neurotic, stress-related and somatic disorder (F4)        | 3747 (31.0)                | 22785 (30.8)                                  | 0.004                      |
| Mood and neurotic disorders (F3 and F4)                   | 1582 (13.1)                | 8026 (10.8)                                   | 0.071                      |
| Other disorders                                           | 272 (2.2)                  | 1454 (2.0)                                    | 0.014                      |
| Multiple BZDs on first prescription                       | 1515 (12.5)                | 8179 (11.0)                                   | 0.047                      |
| Type of BZD <sup>a</sup>                                  |                            |                                               |                            |
| Hypnotic                                                  | 3918 (32.4)                | 22494 (30.4)                                  | 0.043                      |
| Anxiolytic                                                | 7353 (60.8)                | 47211 (63.8)                                  | -0.062                     |
| Both                                                      | 832 (6.9)                  | 4339 (5.9)                                    | 0.041                      |
| Administration instructions <sup>a</sup>                  |                            |                                               |                            |
| As needed                                                 | 2992 (24.7)                | 18937 (25.6)                                  | -0.021                     |
| Regular prescription: 1 week (1-7 days)                   | 3815 (31.5)                | 22858 (30.9)                                  | 0.013                      |
| Regular prescription: 2 weeks (8-14 days)                 | 3808 (31.5)                | 22324 (30.1)                                  | 0.030                      |
| Regular prescription: more than 2 weeks ( $\geq$ 15 days) | 1488 (12.3)                | 9925 (13.4)                                   | -0.033                     |
| Half-life of BZD <sup>a</sup>                             |                            |                                               |                            |
| Short (< 12 h)                                            | 7858 (64.9)                | 48892 (66.0)                                  | -0.023                     |
| Medium (12-24 h)                                          | 2236 (18.5)                | 12098 (16.3)                                  | 0.058                      |
| Long ( $\geq$ 24 h)                                       | 2009 (16.6)                | 13054 (17.6)                                  | -0.027                     |

Data presented as n (%) unless otherwise specified.

BZD, benzodiazepines and Z-drugs; SD, standard deviation.

a: Characteristics of BZD with the longest prescription days in the first prescription
