# Supplementary material for: Factors associated with long-term prescription of benzodiazepine: a retrospective cohort study using a health insurance database in Japan
Source: PubMed Central journal article supplement — BMJ Open. 2019 Jul 26;9(7):e029641. doi: 10.1136/bmjopen-2019-029641 (PMC6661576; doi:10.1136/bmjopen-2019-029641), 2019-07-26
Supplement: bmjopen-2019-029641supp003.pdf [file bmjopen-2019-029641supp003.pdf]

Supplementary Table 3

Demographics and clinical characteristics of new users of BZD when using different definitions for long-term prescription

|                                                     | BZD < 6 months<br>(N=81409) |                             | p      | BZD < 12 months<br>(N=61857) |                              | p      |
|-----------------------------------------------------|-----------------------------|-----------------------------|--------|------------------------------|------------------------------|--------|
|                                                     | BZD < 6 months<br>(N=81409) | BZD ≥ 6 months<br>(N=81409) |        | BZD < 12 months<br>(N=61857) | BZD ≥ 12 months<br>(N=61857) |        |
| Age (mean, SD)                                      | 42.2 (11.9)                 | 41.9 (11.4)                 | 0.01   | 42.3 (11.7)                  | 42.2 (11.0)                  | 0.83   |
| Sex, male                                           | 35731 (49.8)                | 5821 (60.4)                 | <0.001 | 29468 (50.8)                 | 2338 (61.6)                  | <0.001 |
| Occupational status, employed                       | 46011 (64.1)                | 6902 (71.6)                 | <0.001 | 37458 (64.5)                 | 2735 (72.0)                  | <0.001 |
| Cancer                                              | 7481 (10.4)                 | 1079 (11.2)                 | 0.02   | 6075 (10.5)                  | 379 (10.0)                   | 0.36   |
| Medical specialty, psychiatry                       | 18922 (26.4)                | 5401 (56.0)                 | <0.001 | 15645 (26.9)                 | 2206 (58.1)                  | <0.001 |
| Psychiatric diagnosis                               |                             |                             | <0.001 |                              |                              | <0.001 |
| None                                                | 30772 (42.9)                | 1958 (20.3)                 |        | 24701 (42.5)                 | 709 (18.7)                   |        |
| Mood disorder (F3)                                  | 9839 (13.7)                 | 3211 (33.3)                 |        | 8385 (14.4)                  | 1338 (35.2)                  |        |
| Neurotic, stress-related and somatic disorder (F4)  | 22978 (32.0)                | 2119 (22.0)                 |        | 18203 (31.4)                 | 777 (20.5)                   |        |
| Mood and neurotic disorders (F3 and F4)             | 6840 (9.5)                  | 2093 (21.7)                 |        | 5711 (9.8)                   | 857 (22.6)                   |        |
| Other disorders                                     | 1341 (1.9)                  | 258 (2.7)                   |        | 1061 (1.8)                   | 115 (3.0)                    |        |
| Multiple BZDs on first prescription                 | 6650 (9.3)                  | 2339 (24.3)                 | <0.001 | 5798 (10.0)                  | 1023 (26.9)                  | <0.001 |
| Type of BZD <sup>a</sup>                            |                             |                             | <0.001 |                              |                              | <0.001 |
| Hypnotic                                            | 21290 (29.7)                | 3550 (36.8)                 |        | 17411 (30.0)                 | 1428 (37.6)                  |        |
| Anxiolytic                                          | 47097 (65.6)                | 4707 (48.8)                 |        | 37659 (64.9)                 | 1754 (46.2)                  |        |
| Both                                                | 3383 (4.7)                  | 1382 (14.3)                 |        | 2991 (5.2)                   | 614 (16.2)                   |        |
| Administration instructions <sup>a</sup>            |                             |                             | <0.001 |                              |                              | <0.001 |
| As needed                                           | 19365 (27.0)                | 1481 (15.4)                 |        | 15277 (26.3)                 | 543 (14.3)                   |        |
| Regular prescription: 1 week (1-7 days)             | 21902 (30.5)                | 3296 (34.2)                 |        | 17699 (30.5)                 | 1347 (35.5)                  |        |
| Regular prescription: 2 weeks (8-14 days)           | 21089 (29.4)                | 3493 (36.2)                 |        | 17285 (29.8)                 | 1360 (35.8)                  |        |
| Regular prescription: more than 2 weeks (≥ 15 days) | 9414 (13.1)                 | 1369 (14.2)                 |        | 7800 (13.4)                  | 546 (14.4)                   |        |
| Half-life of BZD <sup>a</sup>                       |                             |                             | <0.001 |                              |                              | <0.001 |
| Short (< 12 h)                                      | 48097 (67.0)                | 5655 (58.7)                 |        | 38801 (66.8)                 | 2207 (58.1)                  |        |
| Medium (12-24 h)                                    | 11210 (15.6)                | 2191 (22.7)                 |        | 9100 (15.7)                  | 882 (23.2)                   |        |
| Long (≥ 24 h)                                       | 12463 (17.4)                | 1793 (18.6)                 |        | 10160 (17.5)                 | 707 (18.6)                   |        |

Data presented as n (%) unless otherwise specified.

BZD, benzodiazepines and Z-drugs; SD, standard deviation.

a: Characteristics of BZD with the longest prescription days in the first prescription
