# Supplementary material for: Factors associated with long-term prescription of benzodiazepine: a retrospective cohort study using a health insurance database in Japan
Source: PubMed Central journal article supplement — BMJ Open. 2019 Jul 26;9(7):e029641. doi: 10.1136/bmjopen-2019-029641 (PMC6661576; doi:10.1136/bmjopen-2019-029641), 2019-07-26
Supplement: bmjopen-2019-029641supp005.pdf [file bmjopen-2019-029641supp005.pdf]

Supplementary Table 5

Factors related to long-term BZD prescription ( $\geq 8$  months) among the new BZD users with as-needed prescription or regular prescription

|                                                    | As needed (n=18937) |              |        | Regular (n=55107) |              |        |
|----------------------------------------------------|---------------------|--------------|--------|-------------------|--------------|--------|
|                                                    | OR                  | 95% CI       | p      | OR                | 95% CI       | p      |
| Age                                                | 1.01                | 1.00 to 1.02 | <0.01  | 1.02              | 1.01 to 1.02 | <0.001 |
| Sex, male                                          | 1.13                | 0.95 to 1.35 | 0.17   | 1.14              | 1.05 to 1.23 | <0.01  |
| Occupational status, employed                      | 0.97                | 0.81 to 1.17 | 0.75   | 0.98              | 0.90 to 1.06 | 0.61   |
| Cancer                                             | 1.41                | 1.17 to 1.71 | <0.001 | 1.11              | 1.00 to 1.22 | 0.04   |
| Medical specialty, psychiatry                      | 1.18                | 0.98 to 1.42 | 0.08   | 1.96              | 1.81 to 2.11 | <0.001 |
| Psychiatric diagnosis                              |                     |              |        |                   |              |        |
| None                                               | Ref.                |              |        |                   |              |        |
| Mood disorder (F3)                                 | 3.00                | 2.36 to 3.82 | <0.001 | 3.41              | 3.08 to 3.77 | <0.001 |
| Neurotic, stress-related and somatic disorder (F4) | 1.53                | 1.24 to 1.89 | <0.001 | 1.52              | 1.38 to 1.67 | <0.001 |
| Mood and neurotic disorders (F3 and F4)            | 4.16                | 3.24 to 5.34 | <0.001 | 3.53              | 3.16 to 3.95 | <0.001 |
| Other disorders                                    | 2.13                | 1.44 to 3.15 | <0.001 | 2.48              | 2.05 to 2.99 | <0.001 |
| Multiple BZDs on first prescriptions <sup>a</sup>  | 1.45                | 0.79 to 2.65 | 0.23   | 1.37              | 1.25 to 1.51 | <0.001 |
| Type of BZD <sup>a</sup>                           |                     |              |        |                   |              |        |
| Hypnotic                                           | Ref.                |              |        |                   |              |        |
| Anxiolytic                                         | 0.44                | 0.37 to 0.52 | <0.001 | 0.67              | 0.62 to 0.72 | <0.001 |
| Both                                               | 0.70                | 0.36 to 1.39 | 0.31   | 0.99              | 0.88 to 1.12 | 0.90   |
| Half-life of BZD <sup>a</sup>                      |                     |              |        |                   |              |        |
| Short (< 12 h)                                     | Ref.                |              |        |                   |              |        |
| Medium (12-24 h)                                   | 1.11                | 0.92 to 1.33 | 0.28   | 1.10              | 1.02 to 1.19 | 0.02   |
| Long ( $\geq 24$ h)                                | 0.80                | 0.60 to 1.07 | 0.13   | 0.95              | 0.87 to 1.03 | 0.22   |

BZD, benzodiazepines and Z-drugs; OR, odds ratio; CI, confidence interval

a: Characteristics of BZD with the longest prescription days in the first prescription
